## Multiple PLC $\beta$ signaling pathways in taste receptor cells contribute to the detection of bitter, sweet and umami stimuli

Debarghya Dutta Banik<sup>1</sup>, Eric D. Benfey<sup>1</sup>, Laura E. Martin<sup>2</sup>, Kristen E. Kay<sup>2</sup>, Gregory C. Loney<sup>2</sup>, Amy R. Nelson<sup>1</sup>, Zachary C. Ahart<sup>1</sup>, Barrett T. Kemp<sup>1</sup>, Bailey R. Kemp<sup>1</sup>, Aurelie Vandenbeuch<sup>3</sup>, Ann-Marie Torregrossa<sup>2,4</sup> and Kathryn F. Medler<sup>\*1</sup>

<sup>1</sup>Department of Biological Sciences, University at Buffalo, Buffalo, NY 14260, USA.

<sup>2</sup>Department of Psychology, University at Buffalo, Buffalo, NY 14260, USA.

<sup>3</sup>Department of Otolaryngology, University of Colorado, Aurora, CO, USA

<sup>4</sup>Center for Ingestive Behavior Research, University at Buffalo, Buffalo, NY 14260, USA

\*Corresponding author: Email: [kmedler@buffalo.edu](mailto:kmedler@buffalo.edu)

**Summary:** This study identifies a new role for PLC $\beta$ 3 in the transduction of bitter, sweet and umami taste stimuli and demonstrates that multiple taste cell populations respond to these stimuli.

1 **ABSTRACT**

2 Taste receptor cells use multiple signaling pathways to detect chemicals. While  
3 salty and sour stimuli bind ion channels, bitter, sweet and umami stimuli activate a  
4 GPCR/PLC $\beta$ 2/IP $_3$ R3 signaling pathway. Current thinking is that all bitter, sweet and  
5 umami stimuli are detected by Type II cells via a PLC $\beta$ 2/IP $_3$ R3 pathway. Using live cell  
6 calcium (Ca $^{2+}$ ) imaging on isolated taste receptor cells from mice lacking IP $_3$ R3 in Type  
7 II cells, we find many taste cells still robustly respond to bitter, sweet and umami stimuli,  
8 including a subset of Type III taste cells. Immunohistochemical analysis reveals that  
9 PLC $\beta$ 3 is not expressed in Type II cells but is present in other taste cell populations,  
10 including a subset of Type III cells. Loss of either IP $_3$ R3 or PLC $\beta$ 3 in taste receptor cells  
11 cause comparable reductions in c-Fos labeling in the nucleus of the solitary tract  
12 following oral infusion of quinine. Short term behavioral assays also demonstrate that  
13 loss of either IP $_3$ R3 from Type II cells or loss of PLC $\beta$ 3 causes similar taste deficits,  
14 indicating that both molecules are required for normal taste transduction. Our data  
15 identify a critical, and previously unknown, role for PLC $\beta$ 3 in taste transduction and  
16 demonstrate that input from multiple PLC $\beta$  pathways/taste receptor cell populations are  
17 required to transduce bitter, sweet and umami stimuli.

18

19

20

21

22

23

24 **SIGNIFICANCE STATEMENT**

25           It is currently thought that the transduction of bitter, sweet and umami stimuli in  
26 taste cells depends solely on GPCR/PLC $\beta$ 2/IP $_3$ R3 signaling in Type II taste receptor  
27 cells. However, in the absence of either PLC $\beta$ 2 or IP $_3$ R3, mice have reduced, but not  
28 abolished, ability to detect these stimuli, suggesting that other taste cells also contribute  
29 to taste transduction. When IP $_3$ R3 is absent, Type II cells do not generate a Ca $^{2+}$  signal  
30 to these taste stimuli; however, other taste receptor cells respond to bitter, sweet and  
31 umami stimuli, including a subset of Type III cells. We identified a PLC $\beta$ 3 pathway that  
32 is expressed in non-Type II taste cells, including a subset of Type III cells. Loss of  
33 PLC $\beta$ 3 significantly reduced taste cell responses, cFos-labeling in the nucleus of the  
34 solitary tract, and caused significant behavioral deficits. We conclude that PLC $\beta$ 3 has  
35 an important role in taste transduction.

36

37 Chemicals in the oral cavity are detected by taste receptor cells which are  
38 grouped together in taste buds found in epithelial specializations in the tongue called  
39 papillae. There are three main papillae: Circumvallate (CV), foliate (Fol), and fungiform  
40 (Fun) which differ in their localization on the tongue and innervation by the cranial  
41 nerves. Despite these differences, taste papillae all house taste buds that are  
42 comprised of distinct cell types that vary in their signaling functions within the bud (1).

43 The current view of taste transduction is that taste buds are comprised of Type I,  
44 Type II and Type III taste receptor cells (2). Type I cells are thought to primarily function  
45 as support cells and share some characteristics of glia cells (3), while Type II cells  
46 detect bitter, sweet or umami stimuli through the activation of specific GPCRs for each  
47 of these taste qualities. The subsequent transduction of these taste qualities within the  
48 cells are due to a single signaling pathway that is comprised of phospholipase C $\beta$ 2  
49 (PLC $\beta$ 2) that activates the inositol 1,4,5-trisphosphate receptor type 3 (IP $_3$ R3) on the  
50 endoplasmic reticulum to cause Ca $^{2+}$  release (4-6). This Ca $^{2+}$  release activates the  
51 transient receptor potential cation channel subfamily M members 4 and 5 (TRPM4 and  
52 TRPM5) which depolarize the cell sufficiently to activate the release of ATP through the  
53 calcium homeostasis modulator 1 (CALHM1) channel (5, 7-11). The expression of  
54 PLC $\beta$ 2, IP $_3$ R3 and TRPM5 is restricted to Type II taste cells within the bud and these  
55 cells lack both voltage-gated calcium channels (VGCCs) and conventional chemical  
56 synapses (model shown in Figure 1A)(12-16). Type III cells detect sour and salt stimuli  
57 through ionotropic receptors that depolarize the cell to activate VGCCs and cause  
58 vesicular neurotransmitter release (17-23) (see Figure 1A). It is currently thought that  
59 Type III cells do not respond to bitter, sweet or umami stimuli.

60 While this is the widely accepted view of signal transduction in peripheral taste  
61 cells, multiple genetic studies have reported that the deletion of individual signaling  
62 proteins in Type II cells, including PLC $\beta$ 2, IP $_3$ R3 and TRPM5, does not abolish the  
63 ability to detect all bitter sweet and umami stimuli (24-28). Similarly, the loss of Type II  
64 cells leads to severely reduced, but not abolished, responses to bitter, sweet and  
65 umami stimuli (29). These studies support the idea that additional signaling pathways  
66 are present in taste cells, but to date, few studies have focused on identifying these  
67 alternatives (30, 31). We previously reported that some taste cells generate Ca $^{2+}$   
68 responses to a bitter stimulus and cell depolarization, suggesting that taste cells with  
69 VGCCs, presumably Type III cells, respond to at least one bitter compound (32). A  
70 separate report also found some taste cells with VGCCs can respond to bitter stimuli  
71 (19). These studies led us to hypothesize that in addition to Type II cells, a separate  
72 population of taste cells may contribute to the detection of bitter, sweet and umami  
73 stimuli. To test this hypothesis, we used live cell imaging in mice that lack IP $_3$ R3 and  
74 found that many taste cells still responded to bitter, sweet and umami stimuli, including  
75 a subset of Type III cells. These cells responded to taste stimuli through a distinct  
76 PLC $\beta$  which we identified as PLC $\beta$ 3. We conclude that multiple populations of taste  
77 cells use distinct signaling pathways to respond to bitter, sweet and umami stimuli.

78

## 79 **RESULTS**

80 **Bitter, sweet and umami taste evoked responses are still present in IP $_3$ R3-KO**

81 **mice**

82 IP<sub>3</sub>R3 is part of the canonical signaling pathway in Type II cells that respond to  
83 bitter, sweet and umami stimuli and its expression is localized in Type II cells (4, 12, 16,  
84 33). One study using single cell PCR reported mRNA levels for IP<sub>3</sub>R3 in both Type II  
85 cells and some SNAP25+ cells (a Type III marker) but did not evaluate protein  
86 expression for these compounds (34). In contrast, another study using an IP<sub>3</sub>R3-GFP  
87 mouse reported that GFP+ cells did not functionally express VGCCs, a physiological  
88 marker for Type III cells (32). While these conflicting reports suggest that it is possible  
89 that IP<sub>3</sub>R3 expression is not restricted to Type II cells, for the purposes of our current  
90 study, we are presuming that IP<sub>3</sub>R3 is only expressed in Type II cells.

91 To evaluate the taste evoked signaling in taste receptor cells that lack the ability  
92 to release Ca<sup>2+</sup> via IP<sub>3</sub>R3, we used a transgenic mouse in which GFP replaces the  
93 coding region of IP<sub>3</sub>R3. In these mice, GFP labels the cells that should express IP<sub>3</sub>R3  
94 but no longer do so. Initial immunohistochemical analyses found that taste cells from the  
95 CV papillae of wild type mice were successfully labeled with anti-IP<sub>3</sub>R3 antibody (n=3;  
96 Figure S1A), while their KO littermates lacked IP<sub>3</sub>R3 labeling but instead have GFP  
97 expression (n=6; Figure S1B). Furthermore, anti-IP<sub>3</sub>R3 labels the GFP expressing cells  
98 in IP<sub>3</sub>R3-heterozygous mice (n=4; Figure S1C); confirming that GFP expression identifies  
99 the taste cells that normally express IP<sub>3</sub>R3. To further characterize this mouse, we  
100 evaluated the expression of other proteins that are part of this established signaling  
101 pathway in Type II cells. The GFP expression in the KO mice co-localized with both  
102 PLCβ2 (n=4; Figure S1D) and gustducin (n=3; Figure S1E) labeling. As expected,  
103 gustducin expression was restricted to the IP<sub>3</sub>R3-GFP-KO cells but not all GFP  
104 expressing cells had gustducin while there was complete overlap between PLCβ2

105 labeling and GFP. Co-localization analyses are reported in Figures S1F. Thus the  
106 other components of the signaling pathway normally found in Type II cells are intact but  
107 these cells no longer have the capacity to release  $\text{Ca}^{2+}$  in response to bitter, sweet or  
108 umami stimuli.

109 We evaluated this  $\text{IP}_3\text{R3-GFP-KO}$  mouse using Fura2-AM to measure the taste-  
110 evoked  $\text{Ca}^{2+}$  responses in taste receptor cells. All measurements were made in  
111 isolated taste cells that were no longer associated with the taste bud to ensure that the  
112 taste-evoked  $\text{Ca}^{2+}$  responses were due solely to the activity of the individual taste cells  
113 and not cell-to-cell communication (example in Figure 1B, C). We applied multiple  
114 bitter, sweet and umami stimuli as well as 50mM KCl to isolated cells from CV, Fol or  
115 Fun papillae of the wild type and  $\text{IP}_3\text{R3-KO}$  mice. Since our goal was to identify all (or  
116 most) responsive taste cells, we used the stimulus concentration that generated a  
117 maximal  $\text{Ca}^{2+}$  signal. These concentrations were based on control experiments we  
118 used to identify the lowest stimulus concentration that generated the maximal  $\text{Ca}^{2+}$   
119 signal (examples shown in Figure S2, A-C). This increased our likelihood of identifying  
120 responsive taste cells but did not generate any non-specific responses (Figure S2, D,  
121 E). As shown in Figure S2C, a GFP+ cell did not respond to any concentration of  
122 stimulus applied. Thus, the taste cells respond to a wide range of stimulus  
123 concentrations and the reported responses are not due to a concentration or osmotic  
124 effect.

125 We reasoned that if the Type II cells were solely responsible for all bitter, sweet  
126 and umami taste transduction, then the loss of  $\text{IP}_3\text{R3}$  in Type II cells would abolish all  
127  $\text{Ca}^{2+}$  responses to bitter, sweet and umami stimuli. In the  $\text{IP}_3\text{R3-KO}$  mice, GFP-

128 expressing cells lack IP<sub>3</sub>R3 and did not respond to any taste stimuli tested (n=80, Figure  
129 2B, S2C); however, a large number of non-GFP expressing taste cells responded to the  
130 stimuli. Initially, the response frequencies (*total number of responsive cells/total*  
131 *number of cells stimulated*) were measured for all taste cells from the wild type (WT)  
132 and IP<sub>3</sub>R3-KO mice, including both GFP+ and GFP- cells (Figure 2A). The table in  
133 Figure 2A reports the taste response frequencies in wild type (WT) and IP<sub>3</sub>R3-KO mice  
134 with the GFP+ cells included in the analysis. Not all cells were exposed to all stimuli  
135 and some cells responded to multiple stimuli. These experimental conditions preclude  
136 the data from being additive, so we compared the frequency of responses for a given  
137 stimulus between the wild type and IP<sub>3</sub>R3-KO mice. These data demonstrate that the  
138 overall responsiveness to bitter, sweet, and/or umami stimuli was significantly reduced  
139 ( $p < 0.0001$ ) in the KO mice compared to WT cells. The likelihood that taste cells from  
140 CV would respond to taste stimuli was significantly reduced ( $p = 0.0003$ ). The  
141 responsiveness of the taste cells from the Fol and Fun papillae was not significantly  
142 affected by the loss of IP<sub>3</sub>R3, even though the GFP+ cells were included in this  
143 analysis.

144 To further characterize the response profiles of the non-Type II taste cells, we  
145 analyzed the non-GFP expressing cells and plotted the response frequencies for each  
146 papillae and stimulus (Figure 2B-E). The GFP+ cells were not included in these  
147 response analyses and descriptions of the different taste cell populations are shown in  
148 Supplementary Table 1. Figure 2B compares the overall percent responsiveness of WT  
149 and KO mice for each papillae type (without the GFP+ cells) while the graphs in Figures  
150 2C-E show the percentage of responsive cells in each papillae type for each specific



151 stimulus applied. The overall responsiveness of taste cells was only significantly  
152 reduced in the CV papillae when IP<sub>3</sub>R3 was absent ( $p < 0.01$ ). Analysis of the individual  
153 stimuli for each papillae type (Figures 2C-E) identified significant reductions in the  
154 responsiveness to the sweet stimuli tested in the KO mice. Individual cell numbers are  
155 provided in Figure S3. Therefore, removing a key protein in the canonical  
156 GPCR/PLC $\beta$ 2/IP<sub>3</sub>R3 signaling pathway in Type II cells does not eliminate the ability of  
157 all taste cells to generate Ca<sup>2+</sup> signals when stimulated by bitter, sweet or umami  
158 stimuli. Based on these data, we hypothesize there are additional signaling pathways  
159 that respond to these stimuli.

#### 160 **Bitter, sweet and umami stimuli are dependent on a PLC $\beta$ signaling pathway in** 161 **IP<sub>3</sub>R3-KO mice**

162 To identify the type of signaling pathway that generates the taste responses in  
163 the non-GFP cells in the IP<sub>3</sub>R3-KO mice, we analyzed bitter (5mM Den), sweet (20mM  
164 sucrose) and umami (10mM MPG) stimuli and found they generated signals in Ca<sup>2+</sup>-free  
165 Tyrode's, indicating these signals depend on Ca<sup>2+</sup> release from internal stores (Figure  
166 3A,D,G). We confirmed these results by applying thapsigargin to disrupt the internal  
167 Ca<sup>2+</sup> stores which abolished the taste evoked Ca<sup>2+</sup> signals (Figure 3B,E,H). These  
168 responses were also eliminated when the general PLC blocker U73122 was applied  
169 (Figure 3C,F,I), indicating that these taste evoked Ca<sup>2+</sup> responses in the IP<sub>3</sub>R3-KO mice  
170 are due to the activation of another PLC signaling pathway. Individual data points for  
171 each experiment are shown in Figure S4.

#### 172 **PLC $\beta$ 3 expression in peripheral taste cells**

173 To identify other PLC $\beta$  isoforms expressed in taste receptor cells, we analyzed  
174 previously published RNAseq data (35). We found that PLC $\beta$ 2 and PLC $\beta$ 3 were  
175 expressed at comparable levels and were the predominant PLC $\beta$  isoforms present in  
176 taste cells. Therefore, we investigated the possibility that PLC $\beta$ 3 is expressed in  
177 peripheral taste cells. Immunohistochemical experiments in the IP $_3$ R3-KO mouse  
178 revealed strong PLC $\beta$ 3 labeling that was separate from the Type II cells (identified with  
179 GFP expression) in the CV, Fol and Fun papillae (Figure 4A-C). Colocalization analysis  
180 is shown in Figure 4D. These data were confirmed using both the TRPM5-GFP mouse  
181 as well as co-labeling with PLC $\beta$ 2 in C57BL/6 mice (Type II cell markers, Figure S5A, B,  
182 colocalization analysis shown in S5D). Co-labeling with the Type I taste marker  
183 NTPDase2 found that PLC $\beta$ 3 is also not expressed in Type I cells (Figure S5C). We  
184 used qPCR to measure the relative amounts of mRNA for PLC $\beta$ 3 and PLC $\beta$ 2 in the  
185 different papillae (Figure S5E,F) and found that both PLC $\beta$ 2 and PLC $\beta$ 3 are expressed  
186 in CV, Fol and Fun papillae. We conclude that both PLC $\beta$ 2 and PLC $\beta$ 3 are highly  
187 expressed in peripheral taste cells but that PLC $\beta$ 3 is not expressed in either Type I or  
188 Type II taste cells. Our next goal was to identify the cell population that expresses the  
189 PLC $\beta$ 3 signaling pathway and responds to bitter, sweet and umami stimuli.

### 190 **Some Type III cells respond to bitter, sweet and umami stimuli**

191 The only other identified taste receptor cell type is the Type III cell. Type III cells  
192 are the only taste cell population that express VGCCs (36) and can be functionally  
193 identified in live cell imaging by the ability to respond to cell depolarization with a Ca $^{2+}$   
194 influx through the opening of VGCCs (19, 37). Earlier studies have reported that Type III  
195 cells are sour sensitive and that a subset of the sour-sensitive Type III cells is also salt

196 sensitive (17, 19, 38). To functionally identify Type III cells, we applied 50mM KCl to  
197 cause a cell depolarization which generated a  $\text{Ca}^{2+}$  signal if the cell expresses VGCCs.  
198 Therefore, if a cell responded to 50mM KCl with a  $\text{Ca}^{2+}$  signal, we concluded that it  
199 expresses VGCCs and identified it as a Type III cell. We found that some Type III taste  
200 cells in the  $\text{IP}_3\text{R3-KO}$  mouse responded to bitter, sweet and umami stimuli (Figure 5A-  
201 C). To confirm that the taste cells that responded to 50mM KCl and bitter, sweet or  
202 umami stimuli were Type III cells, we tested a subset of cells with sour (citric acid) and  
203 salt (NaCl) stimuli (Figure 5D-F). All of the taste cells that responded to 50mM KCl  
204 responded to citric acid with a  $\text{Ca}^{2+}$  signal (CA) while some of these cells also  
205 responded to bitter, sweet and/or umami stimuli (Figure 5D, F). Interestingly, a  
206 separate subset of 50mM KCl/CA cells responded to NaCl with a  $\text{Ca}^{2+}$  signal but were  
207 not sensitive to the bitter, sweet, umami stimuli (Figure 5E, F). This indicates that the  
208 sour/salt sensitive Type III cells are separate from the sour sensitive Type III cells that  
209 respond to bitter, sweet and/or umami stimuli with a  $\text{Ca}^{2+}$  signal. Thus a subset of Type  
210 III cells are dual responsive (DR) because they express VGCCs and are sour sensitive  
211 but also respond to bitter, sweet and/or umami stimuli.

212 To determine if the loss of  $\text{IP}_3\text{R3}$  in Type II cells affected the activity of DR cells,  
213 we compared the percentage of cells that responded to any stimulus (bitter, sweet,  
214 umami or 50mM KCl) in wild type and  $\text{IP}_3\text{R3-KO}$  mice. These data include all taste cells  
215 from all three papillae taken from Figure 2A. As shown before, the overall  
216 responsiveness to taste stimuli in the  $\text{IP}_3\text{R3-KO}$  mice was significantly reduced  
217 compared to wild type (Figure 5G); however, the percentage of DR cells in the  $\text{IP}_3\text{R3-}$   
218 KO was not different from wild type mice (Figure 5G). Therefore, the ability of the DR

219 cells to respond to taste stimuli does not depend on the presence of IP<sub>3</sub>R3 in Type II  
220 cells (Figure 5G, H).

221 We also performed control experiments using the GAD67-GFP mice as a cellular  
222 marker to identify Type III taste cells (39) and found that both GAD67-GFP positive and  
223 negative taste cells responded to taste stimuli + 50mM KCl with Ca<sup>2+</sup> signals (Figure  
224 S6A-B). DR cells were also identified in C57BL/6 mice (Figure S6C). A recent study  
225 reported that some Type III cells from C57BL/6 mice responded to bitter stimuli (19) in  
226 agreement with our findings. Thus, DR Type III taste cells are present in taste cells in  
227 multiple mouse lines.

### 228 **PLCβ3 contributes to taste evoked signaling in a subset of Type III cells**

229 So far our data have identified that 1) there is a population of taste cells that do  
230 not depend on IP<sub>3</sub>R3 (in Type II cells) to respond to bitter, sweet and umami, 2) PLCβ3  
231 is expressed in taste cells, and 3) some Type III cells are DR and can respond to bitter,  
232 sweet and umami stimuli. We hypothesized that PLCβ3 is involved in the signaling of  
233 the DR cells. We next performed live cell imaging on isolated cells from CV, Fol, and  
234 Fun papillae of PLCβ3-KO and wild type mice to evaluate how the loss of PLCβ3 affects  
235 taste cell responsiveness, in particular the responsiveness of the DR cells. Loss of  
236 PLCβ3 resulted in significant reductions in the overall responsiveness of the PLCβ3-KO  
237 Fol and Fun cells but not the CV cells (Figure 6A,B). Knocking out PLCβ3 had a two-  
238 fold effect, it reduced the number of responses to bitter, sweet or umami stimuli and it  
239 significantly reduced the number of DR taste cells in CV, Fol and Fun taste cells (Figure  
240 6C-E). Control experiments found no change in the ability of Type III cells to respond to  
241 sour or salt stimuli (Figure S7A-C). Type II cells were also still functional in PLCβ3-KO

242 mice (Figure S7D-F). Individual cell numbers are shown in Figure S8. These data  
243 indicate that PLC $\beta$ 3 is contributing to the activity of the DR cells.

244 We next determined if PLC $\beta$ 3 is expressed in Type III cells using SNAP-25 which  
245 is a synaptic protein that is a cellular marker for Type III taste cells (16, 40).  
246 Immunohistochemical analysis found some co-expression of PLC $\beta$ 3 and SNAP25 in  
247 wild type mice (Figure S9A,B,E). There was no loss of SNAP-25 expression in the  
248 PLC $\beta$ 3-KO mouse compared to WT (Figure S9C,D). Thus, PLC $\beta$ 3 is expressed in some  
249 Type III cells and the loss of this protein did not affect the expression of SNAP25 in  
250 Type III cells.

251 The significant reduction in the number of taste evoked Ca<sup>2+</sup> responses in the DR  
252 cells from PLC $\beta$ 3-KO mice suggests that PLC $\beta$ 3 is responsible for transducing most of  
253 the taste-evoked responses in these cells. To determine if the loss of both IP<sub>3</sub>R3 and  
254 PLC $\beta$ 3 would completely abolish the ability to respond to bitter, sweet and umami  
255 stimuli, we attempted to generate a double knock out mouse by breeding the IP<sub>3</sub>R3-KO  
256 and PLC $\beta$ 3-KO mice but the mice were not viable.

257 **Loss of PLC $\beta$ 3 causes deficits in the taste-evoked activity in the nucleus of the**  
258 **solitary tract.**

259 To determine if the loss of IP<sub>3</sub>R3 or PLC $\beta$ 3 in taste cells affected the taste signal  
260 that is sent to the brain, we measured the neural activity in the nucleus of the solitary  
261 tract (NTS) using c-Fos labeling as a marker for activated neurons. This approach is  
262 commonly used to identify recently activated neurons, including neurons in the taste  
263 pathway (41-45). The NTS receives input from the gustatory neurons and is the first  
264 synaptic relay from the peripheral taste system. Mice (n=3 for each condition) were

265 orally infused with quinine (5mM) or water for 30 min. The level of c-Fos labeling for  
266 both IP<sub>3</sub>R3-KO and PLCβ3-KO mice were compared to WT and water controls. Loss of  
267 either of these proteins resulted in a significant reduction in c-Fos activity to a level that  
268 was comparable to water (Figure 7). Control experiments demonstrate that neither  
269 IP<sub>3</sub>R3 nor PLCβ3 are expressed in this region of the NTS (Figure S10).

270 **Loss of PLCβ3 significantly affects taste-driven licking for bitter, sweet and**  
271 **umami**

272 We then performed brief-access licking experiments to determine if the loss of  
273 taste-evoked signals in the PLCβ3-KO mice correlated with loss of taste sensitivity.  
274 Measurements were also made with IP<sub>3</sub>R3-KO mice for comparison. Since the PLCβ3-  
275 KO mouse has a mixed genetic background while the IP<sub>3</sub>R3-KO mice are in a C57BL/6  
276 background, wild type littermates for both mouse lines were used as controls (Figure 8).  
277 The wild type mice both demonstrated concentration dependent decreases in licking to  
278 denatonium while PLCβ3-KO and IP<sub>3</sub>R3-KO mice treated the solution similarly to water  
279 except for the highest concentration (20mM Den, Figure 8A). Wild type mice treated  
280 MSG (+ 10μM amiloride) solutions as more palatable than water up to 400mM and then  
281 decreased licking at the highest concentrations (600 and 800mM, Figure 8B). Both of  
282 the KO mice treated MSG like water. In the brief access test for the artificial sweetener,  
283 Acesulfame K (AceK), wild type mice increased licking up to 2 mM and then decreased  
284 licking at higher concentrations. Neither of the KO mice had a comparable concentration  
285 dependent change in licking (Figure 8C). Because sucrose is hedonically positive under  
286 wild type conditions, the lick score is calculated as licks to the stimulus minus licks to  
287 water, therefore a score close to zero resembles water. Neither the PLCβ3-KO nor

288 IP<sub>3</sub>R3-KO mice showed a concentration-dependent effect on licking to sucrose until  
289 they were presented with the highest concentration. In contrast, both sets of wild type  
290 mice showed strong concentration dependent increases in licking to sucrose (Figure  
291 8D). For the salt stimulus (NaCl), there were no significant differences in the licking  
292 behavior for either of the KO mice compared to wild type mice, indicating that the ability  
293 to respond to salt is not affected by loss of either PLC $\beta$ 3 or IP<sub>3</sub>R3 (Figure 8E). Thus  
294 loss of either IP<sub>3</sub>R3 or PLC $\beta$ 3 caused comparable, and almost complete, loss of  
295 preference for the bitter, sweet and umami stimuli tested but not salt taste.

### 296 **Response profiles for the dual-responsive taste cells**

297 Finally, we analyzed *how* DR cells respond to taste stimuli. We evaluated a  
298 subset of DR cells that were stimulated with at least one bitter, one sweet and one  
299 umami stimulus *and responded* to at least one of these stimuli. If the DR cells were not  
300 stimulated with all three types of taste qualities, they were excluded from this analysis.  
301 We created response profiles for bitter, sweet and umami in wild type and IP<sub>3</sub>R3-KO  
302 mice (Figure S11A-C) and found that the DR taste cells were most likely to be broadly  
303 tuned (respond to all three types of stimuli). Few, if any, of the DR cells responded to a  
304 single taste quality (in addition to 50mM KCl). We found that the loss of IP<sub>3</sub>R3 did not  
305 influence these response profiles.

### 306 **Three populations of taste cells respond to bitter, sweet and umami stimuli**

307 We repeated the same analysis on taste cells from wild type and IP<sub>3</sub>R3-KO mice  
308 that were stimulated with bitter, sweet, umami and 50mM KCl but *did not respond to*  
309 *50mM KCl* (Figure S11D-F). Therefore, wild type taste cells analyzed included all the  
310 Type II taste cells as well as any other taste cells that responded to bitter, sweet and/or

311 umami stimuli but lack VGCCs. We only analyzed taste cells that responded to at least  
312 one of these stimuli and compiled a response profile for these taste cells from wild type  
313 and IP<sub>3</sub>R3-KO mice. These taste cells were much less likely to be broadly tuned in both  
314 the WT and KO taste cell populations.

315 While the taste-only cells from wild type mice express IP<sub>3</sub>R3 and therefore should  
316 have Type II cells contributing to these response profiles, the analysis of the IP<sub>3</sub>R3-KO  
317 mice was focused on taste cells that were not functional Type II taste cells (due to the  
318 absence of IP<sub>3</sub>R3). These cells also did not respond to 50mM KCl with a Ca<sup>2+</sup> signal  
319 and are not Type III cells. Therefore, this taste cell population lacks functional Type II  
320 cells and VGCCs but responds to bitter, sweet and/or umami stimuli. These functional  
321 data suggest that there are at least three populations of taste cells that can respond to  
322 bitter, sweet and umami stimuli: 1) Type II cells (identified as cells using IP<sub>3</sub>R3), 2) a  
323 subset of Type III cells (which respond to 50mM KCl with a Ca<sup>2+</sup> signal) and 3) another  
324 population of taste cells that are not Type II or Type III cells (neither reliant on IP<sub>3</sub>R3 nor  
325 responsive to 50mM KCl). Future studies are needed to identify and characterize this  
326 taste cell population.

## 327 **DISCUSSION**

328 Our data establish that PLCβ3 signaling in taste receptor cells is important in the  
329 detection of bitter, sweet and umami taste stimuli. The presence of a second signaling  
330 pathway that detects these stimuli resolves a long standing inconsistency in the taste  
331 field. One study concluded that the PLCβ2 signaling pathway in Type II cells is entirely  
332 responsible for the detection of bitter, sweet and umami stimuli (5). A second study  
333 focused on understanding the role of Skn-1a in taste cell formation reported that the



334 loss of Skn-1a caused a significant remodeling of the taste bud. Using *in situ*  
335 hybridization, the authors did not detect the canonical signaling molecules normally  
336 found in Type II cells but did identify an increase in the Type III cell marker expression.  
337 They also reported significant behavioral and gustatory nerve defects for bitter, sweet  
338 and umami stimuli in the absence of Skn-1a, indicating that Type II cells are required to  
339 detect these stimuli (29). However, other studies reported that knocking out any  
340 component of the GPCR/PLC $\beta$ 2/IP $_3$ R3 pathway resulted in reduced, but not abolished,  
341 signaling for these stimuli (24-28, 46-49). There are deficits in taste-evoked signaling  
342 when any part of the GPCR/PLC $\beta$ 2/IP $_3$ R3 pathway is nonfunctional, but they are  
343 variable and there was never complete abolishment of the responses. Nevertheless,  
344 the current dogma within the taste field is that only this signaling pathway is responsible  
345 for all bitter, sweet and umami transduction (5). While this is puzzling, it is likely due to  
346 the lack of another identified signaling pathway that transmits taste signals. We have  
347 now identified that a PLC $\beta$ 3 signaling pathway also detects bitter, sweet and umami  
348 stimuli.

349         Indeed, a closer inspection of the reported findings from these earlier studies  
350 reveals differential deficits in taste responses when the PLC $\beta$ 2/IP $_3$ R3 signaling pathway  
351 is nonfunctional. Evaluations of IP $_3$ R3 loss in mice found impaired behavior and nerve  
352 responses to different taste stimuli, but not abolishment of these signals (25). They  
353 reported reduced behavioral sensitivity for bitter and sweet stimuli at some  
354 concentrations but no differences from controls at other concentrations. The cranial  
355 nerve recordings revealed deficits in signals that varied with the cranial nerve and taste  
356 stimulus being tested (25). These findings confirm that IP $_3$ R3 is required for normal

357 taste signaling but also suggest that it is not the only pathway involved. Similarly, work  
358 focused on the loss of PLC $\beta$ 2 reported reduced, but not abolished, avoidance of bitter  
359 compounds by PLC $\beta$ 2-KO mice (28). In this study, the PLC $\beta$ 2-KO mice did not avoid  
360 denatonium as well as wild type mice but still reduced licking as denatonium  
361 concentration increased. The PLC $\beta$ 2-KO mice did not lick normally for sucrose but did  
362 lick normally for salt and sour stimuli. The authors concluded that a PLC $\beta$ 2-  
363 independent pathway also contributes to taste transduction (28) which agrees with the  
364 IP $_3$ R3-KO study (25). Other studies found that PLC $\beta$ 2 and IP $_3$ R3 co-localize (4, 12, 33)  
365 in Type II taste cells, so it is not surprising that loss of either protein causes similar  
366 deficits in taste-driven behaviors.

367 We measured the neural activity in the NTS using c-Fos labeling as a marker for  
368 activated neurons to determine how the loss of PLC $\beta$ 3 affects central processing of  
369 taste information from the periphery (Figure 7). We used oral infusions of taste stimuli in  
370 awake and behaving animals because it removes any potential confounds due to  
371 anesthetization that is used in other approaches. Since the NTS receives input from the  
372 gustatory neurons and is the first synaptic relay from the peripheral taste system, these  
373 data confirm that loss of either IP $_3$ R3 or PLC $\beta$ 3 in the taste cells abolishes the taste  
374 signal that is sent to the brain. These data from the NTS agrees entirely with our  
375 behavioral data (Figure 8) which together support the idea that both IP $_3$ R3 and PLC $\beta$ 3  
376 have important roles in taste transduction.

377 Loss of PLC $\beta$ 3 caused significant behavioral impairments for the bitter, sweet  
378 and umami stimuli that were comparable to the behavioral deficits when IP $_3$ R3 was not  
379 present in Type II cells. The loss of either protein was specific to these taste stimuli and

380 did not affect salt taste (Figure 8E). These data confirm that the lack of either IP<sub>3</sub>R3  
381 signaling in Type II or PLCβ3 signaling in taste cells had a comparable impact on taste  
382 behaviors (Figure 8). Since PLCβ3 and IP<sub>3</sub>R3 are not expressed in the NTS (Figure  
383 S10) or the geniculate ganglia (50), these data strongly support the idea that input from  
384 both of these signaling molecules in taste cells is required for normal taste behavior.  
385 Therefore, if signaling from either population of taste cells (those using IP<sub>3</sub>R3 or those  
386 using PLCβ3) is impaired, taste information is not properly conveyed to the brain. This  
387 conclusion agrees with other studies which suggest that Type II cells are not the only  
388 cells that transduce bitter, sweet and umami stimuli (24, 25, 27, 28).

389 Our data support the idea that multiple taste receptor mechanisms, outside of  
390 those canonically identified, are involved in the detection of different taste stimuli.  
391 Multiple laboratories have independently concluded that the identified taste receptors  
392 are not solely responsible for transducing all bitter, sweet and umami stimuli. For  
393 instance, the detection of some carbohydrates is not impaired by the loss of T1R2 or  
394 T1R3, the identified sweet receptors (47-49, 51), and umami stimuli appear to be  
395 transduced by receptors in addition to the T1R1+T1R3 heterodimer (31, 52-58).  
396 Moreover, because the identified T1Rs and T2Rs appear to have restricted expression  
397 in Type II taste cells (5, 59), the presence of the PLCβ3 signaling pathway in non-Type  
398 II cells bolsters the hypothesis that additional taste receptor mechanisms are likely  
399 involved in transduction.

400 Our data clearly demonstrate that a subset of Type III cells (DR) are sensitive to  
401 bitter, sweet and/or umami stimuli in contrast to the idea that Type III cells only detect  
402 sour and salty stimuli (19, 38). Furthermore, it appears likely that PLCβ3 is expressed

403 in Type III cells and is responsible for the bitter, sweet and umami responses recorded  
404 in a subset of Type III cells. We previously reported that a PLC $\beta$ 3/IP $_3$ R1 signaling  
405 pathway is expressed in a subset of taste cells that are not Type II cells (32) which our  
406 current data suggest is a subset of Type III cells. These physiological findings are  
407 supported by recent RNA-sequencing analysis of individual Type II and Type III cells  
408 (37) which revealed PLC $\beta$ 3 expression in a subset of Type III cells.

409 We found that many of the DR Type III cells were broadly tuned and responded  
410 to two or more taste qualities, including taste stimuli of different modalities (Figure S6.  
411 S11). Importantly, our studies used isolated taste cells that were not in contact with  
412 neighboring cells. Earlier studies using intact buds or taste epithelium reported that a  
413 subset of taste cells responded to multiple stimuli with some of these studies concluding  
414 these cells likely received input from neighboring taste cells (60-62). While we do not  
415 rule out the possibility that taste cells receive input from other taste cells, our data show  
416 that DR Type III cells do not require neighboring input to respond to bitter, sweet or  
417 umami stimuli.

418 Our study has demonstrated that 1) Type II cells as defined by the expression of  
419 the IP $_3$ R3 are not the *only* taste cells in the bud that detect bitter, sweet and umami  
420 stimuli; 2) taste cells with a PLC $\beta$ 3 pathway also detect bitter, sweet and umami stimuli;  
421 3) PLC $\beta$ 3 is not expressed in Type II cells but is present in a subset of Type III cells and  
422 another population of taste cells that lack VGCCs; and 4) loss of either IP $_3$ R3 or PLC $\beta$ 3  
423 in taste cells causes similar deficits in taste-dependent c-Fos activity in the NTS as well  
424 as deficits in taste driven behaviors. We conclude that peripheral taste transduction is  
425 more complex than is currently appreciated.

## 426 **EXPERIMENTAL PROCEDURES**

### 427 **Mice**

428           Animals were cared for in compliance with the University at Buffalo Institutional  
429 Animal Care and Use Committee. Multiple mouse lines were used in this study. Both  
430 sexes were used and mice ranged in age from 1 to 6 months. Taste cells for qPCR  
431 analyses were collected from C57BL/6 mice. The IP<sub>3</sub>R3-KO mouse was generated in a  
432 C57BL/6 background and was obtained from the Mutant Mouse Resources and  
433 Research Center (MMRRC:032884-JAX). This mouse has a targeted mutation in which  
434 exon 1 is replaced with a MAPT/GFP fusion (63) which results in the expression of GFP  
435 in place of a functional IP<sub>3</sub>R3 receptor. Thus, these mice lack a functional IP<sub>3</sub>R3  
436 receptor and express GFP in cells that would otherwise have expressed IP<sub>3</sub>R3.  
437 Heterozygous mice express both GFP and the IP<sub>3</sub>R3 receptor. The PLCβ3-KO mouse  
438 was generously provided by Dr. Sang-Kyou Han (64). The mutation in these mice  
439 disrupts the catalytic domain of phospholipase C and was generated in a 129SV agouti  
440 mouse strain that was crossed with CD1 mice (65). These mice were maintained in this  
441 mixed background. Immunohistochemical analyses were also performed in the  
442 TRPM5-GFP mouse strain which expresses GFP in all taste cells that express TRPM5.  
443 These mice have been backcrossed into the C57BL/6 background and were used as  
444 another marker of Type II taste cells (16) to evaluate the expression patterns of PLCβ3.  
445 These mice were generously provided by Dr. Robert Margolskee.

### 446 **Taste Receptor Cell Isolation**

447           Taste receptor cells were harvested from CV, Fol and Fun papillae of adult mice  
448 as previously described (32, 66-71). Briefly, mice were sacrificed using carbon dioxide

449 and cervical dislocation. Tongues were removed and an enzyme solution containing  
450 0.7mg/mL Collagenase B (Roche, Basel, Switzerland), 3mg/mL Dispase II (Roche), and  
451 1mg/mL Trypsin Inhibitor (Sigma-Aldrich, St. Louis, MO) was injected beneath the  
452 lingual epithelium. After the tongues were incubated in oxygenated Tyrode's solution  
453 for approximately 17 min, the epithelium was peeled from the underlying muscle and  
454 pinned serosal side up before it was incubated in Ca<sup>2+</sup>-free Tyrode's for approximately  
455 25 min. Cells were removed from taste papillae using capillary pipettes with gentle  
456 suction and placed onto coverslips coated with Cell-Tak (Corning, Corning, NY).

### 457 **Ca<sup>2+</sup> Imaging**

458 All measurements of intracellular calcium (Ca<sup>2+</sup>) were performed in isolated taste  
459 receptor cells that were no longer in contact with other taste cells. Cells were loaded for  
460 20 minutes at room temperature (RT) with 2 μM Fura2-AM (Molecular Probes,  
461 Invitrogen, Carlsbad, CA) containing Pluronic F-127 (Molecular Probes). Loaded cells  
462 were then washed in Tyrode's solution under constant perfusion for 20min. Multiple  
463 taste stimuli and high potassium (50mM KCl) solutions were individually applied and  
464 Ca<sup>2+</sup> responses were recorded. Cells were visualized using an Olympus IX73  
465 microscope with a 40x oil immersion lens and images were captured with a Hamamatsu  
466 ORCA-03G camera (Hamamatsu Photonics K.K., SZK Japan). Excitation wavelengths  
467 of 340nm and 380nm were used with an emission wavelength of 510nm. Cells were  
468 kept under constant perfusion using a gravity flow perfusion system (Automate  
469 Scientific, San Francisco, CA). Images were collected every 4s using Imaging  
470 Workbench 6.0 (Indec Biosystems, Santa Clara, CA). Experiments were graphed and  
471 analyzed using Origin 9.2 software (OriginLab, Northhampton, MA).

472 Intracellular Ca<sup>2+</sup> levels were measured as a ratio of fluorescence intensities.  
473 Fluorescence values were calibrated using the Fura-2 Ca<sup>2+</sup> Imaging Calibration kit  
474 (Invitrogen). The effective dissociation constant K<sub>d</sub> was calculated to be 180nM, which  
475 was used in the following equation to calculate Ca<sup>2+</sup> concentration:

$$476 [Ca^{2+}] = K_d [(R-R_{min})/(R_{max}-R)](S_{f2}/S_{b2})$$

$$477 [Ca^{2+}] = 0.180 [(R-0.338)/(26.81-R)](22.19)$$

478 R is the ratio value of fluorescence obtained after exciting cells at 340 and 380nm. Data  
479 from cells were analyzed if the cell had a stable Ca<sup>2+</sup> baseline within the range of 65nM  
480 and 200nM. An evoked response was defined as measurable if the increase in  
481 fluorescence was at least two standard deviations above baseline.

## 482 Immunohistochemistry

483 Mice were deeply anesthetized by intraperitoneal injections of sodium  
484 pentobarbitol, 40 mg/kg (Patterson Veterinary, Mason, MI). Mice were then injected  
485 intracardially with heparin (Sigma) and 1% sodium nitrate (Sigma) followed by perfusion  
486 with approximately 30mL of 4% paraformaldehyde (Electron Microscopy Sciences, Ft.  
487 Washington, PA) in 0.1M phosphate buffer (PB), pH 7.2. After perfusion, the tongues  
488 were removed and placed in 4% paraformaldehyde/0.1M PB for 1-2h followed by a 4°C  
489 overnight incubation in 20% sucrose/0.1M PB, pH 7.2. For some experiments, tongues  
490 were immersion fixed overnight in 4% paraformaldehyde/0.1M PB, pH 7.2 at 4°C with  
491 20% sucrose. Regardless of the fixation method, the next day, 40µm sections were cut  
492 and washed in PBS 3X10 min at RT. For some experiments, antigen retrieval was  
493 performed by placing sections in 10 mM sodium citrate, pH 8.5 at 80°C for 5 min. This

494 was done to disrupt the cross-bridges formed by fixation and expose antigen binding  
495 sites.

496 Sections were incubated in blocking solution (0.3% Triton X-100, 1% normal goat  
497 serum and 1% bovine serum albumin in 0.1M PB) for 1-2h at RT. Primary antibody was  
498 added to the sections in blocking solution and incubated for 2 hours at RT followed by  
499 overnight exposure to primary antibody at 4°C. Controls with no primary antibody were  
500 included in each experiment. All primary antibodies were diluted in blocking solution.  
501 Mouse anti-IP<sub>3</sub>R3 (Transduction Labs, Lexington, KY) was used at 1:50 following  
502 antigen retrieval. Rabbit anti-PLCβ<sub>3</sub> (Abcam) was used at 1:200, rabbit anti-PLCβ<sub>2</sub>  
503 (Santa Cruz Laboratories, Santa Cruz, CA) was used at 1:1000, rabbit anti-gustducin  
504 (Santa Cruz) was used at 1:200 and anti-NTPDase2 (1:100(72). Mouse anti-SNAP-25  
505 (Genway Biotech, San Diego, CA) was used at 1:200 following antigen retrieval.  
506 Following overnight incubation in primary antibody, sections were washed in PBS 3X10  
507 min at RT and then incubated with the appropriate secondary antibody (Cy5, 1:500;  
508 Rhod, 1:250; Jackson ImmunoResearch Laboratories, West Grove, PA) at RT for 2h in  
509 the dark. Controls were performed for double labeling experiments to ensure secondary  
510 antibodies were not binding to primary antibodies raised in different organisms. After  
511 secondary antibody incubation, sections were washed in PBS (3x10 min) and mounted  
512 on Superfrost Plus slides (VWR, Radnor, PA) using Fluoromount G (Southern  
513 Biotechnology Associates, Birmingham, AL) and coverslipped. All images were  
514 obtained using a Zeiss LSM 710 Confocal Microscope (Zeiss, Oberkochen, Germany).  
515 Stacks were collected using Zen software (Zeiss) and images were processed using  
516 Adobe Photoshop CS5 software adjusting only brightness and contrast.



## 517 **Real-Time PCR of Isolated Taste Cells**

518 Taste receptor cells from CV, Fol or Fun papillae were isolated from the papillae  
519 as described above and then centrifuged for 20min at 13,000 RPM. RNA was purified  
520 using the NucleoSpin RNA XS Kit (Macherey-Nagel, Düren, Germany) according to kit  
521 instructions. PCR analysis was performed for GAPDH to ensure sample quality and  
522 check for genomic contamination. Contaminated samples were discarded and new  
523 samples were collected. Real-Time PCR was performed using a BioRad MiniOpticon  
524 system (Bio-Rad Laboratories, Hercules, CA), with BioRad SYBR Green reagents (Bio-  
525 Rad Laboratories). Primers used for these experiments were: **PLC $\beta$ 2**, *Fwd*:  
526 CAATTGAGGGGCAGCTGAGA *Rev*: TTCTAGGCTGCATCTGGGC; **PLC $\beta$ 3**, *Fwd*:  
527 TCCTGGTGGTCAGGGAT *Rev*: CTGCCTGTCTCTGCTATCCG; **GAPDH** *Fwd*:  
528 ACAGTCAGCCGCATCTTCTT, *Rev*: ACGACCAAATCCGTTGACTC.

529 For real-time PCR analyses, each sample was run in triplicate. If there was more  
530 than 5% difference between the replicates, the data were discarded. Multiple biological  
531 repeats were used for each papillae type (CV, n=6; Fol, n=6; Fun, n=5). Data was  
532 normalized to GAPDH expression for each sample to correct for any loading differences  
533 and reported as fold differences.

## 534 **Oral Infusions**

535 Wild type, IP<sub>3</sub>R3-KO and PLC $\beta$ 3-KO mice (n=3 for each) were tested to measure  
536 the effects of quinine stimulation on the c-Fos immunoreactivity in the nucleus of the  
537 solitary tract (NTS). Water infusions (n=3) were performed to measure background  
538 responses. Surgical procedures were conducted using sterile technique while mice  
539 were anesthetized via 2% - 4% isoflurane anesthesia. Guided by a 21G needle, a small

540 length of PE-90 tubing was passed through the animal's cheek, emerging into the oral  
541 cavity by the rear molars. The tubing was threaded through Teflon washers and heat  
542 flared to secure on both the external and oral sides. Mice were given an analgesic  
543 (0.5mg/ml of carprofen) and allowed to recover. After recovery, they were infused with  
544 either quinine (5mM) or water into the oral catheter for 30 minutes (0.2ml/min, 30 min  
545 infusion). Following the infusion, animals were returned to their cages and left  
546 undisturbed for 45 minutes.

### 547 **Brain Histology and Analysis**

548 After the 45 minute post-infusion period, mice were perfused as described above  
549 and the hindbrains were removed. The following day, hindbrains were sectioned into  
550 40µm coronal sections which were washed in TBS (pH 7.5), 3x10 min each. Sections  
551 were incubated in 1:100 H<sub>2</sub>O<sub>2</sub> in TBS for 15 min, followed by 3x10 min TBS washes.  
552 Sections were then incubated in anti-c-Fos (ab190289; Abcam, 1:1000) diluted in  
553 blocking buffer (3% Normal Donkey Serum in TBS-TritonX) for 1 hr at RT. This was  
554 followed by an overnight incubation at 4°C. The next day, sections were washed 3x10  
555 min in TBS and then incubated for 2 hrs in anti-rabbit secondary antibody (711-065-152,  
556 Jackson Immunoresearch, 1:1000) in blocking buffer. After incubation, sections were  
557 kept in an avidin-biotin mixture (Elite kit; Vector Laboratories) in TBS-TritonX for 1 hr.  
558 Tissue sections were washed (3x10 min in TBS) and then stained with DAB (3,3'-  
559 diaminobenzidine-HCL; Vector Laboratories) for 5 min. Stained tissue sections were  
560 washed (3x5 min in TBS) and mounted onto slides using Fluoromount-G (Southern  
561 Biotechnology Associates). Sections were examined using a light microscope (10-100  
562 X) equipped with a digital camera. Analyses of digital images were performed on the

563 intermediate rostral nucleus tractus solitarius (iRNTS; ~500  $\mu$ m caudal to the dorsal  
564 cochlear nucleus) which receives afferents from both the glossopharyngeal and chorda  
565 tympani nerves and displays dense c-Fos-like immunoreactivity in response to intraoral  
566 delivery of quinine (42, 73). A template tracing of the nucleus was made by an  
567 experimenter blind to genotype and stimulus condition and this template was applied to  
568 all sections. The number of FLI-positive neurons within the template was counted by  
569 hand by an experimenter blind to genotype. Data were analyzed with a one way  
570 ANOVA with follow up Student's t tests to identify individual differences. Significance  
571 level was set at  $p < 0.05$ .

## 572 **Analysis of Licking Behavior**

573 Unconditioned licking responses to varying concentrations of taste stimuli were  
574 recorded in a test chamber designed to measure brief-access licking (Davis MS80 Rig;  
575 Dilog Instruments and Systems, Tallahassee, FL). This apparatus consisted of a  
576 Plexiglas cage with a wire mesh floor. An opening at the front of the cage allowed  
577 access to one of sixteen spill-proof glass drinking tubes that reside on a sliding platform.  
578 A mechanical shutter opened and closed to allow the mouse access to one of the tubes  
579 for a user-specified length of time. A computer controlled the movement of the platform,  
580 order of tube presentation, opening and closing of the shutter, duration of tube access  
581 and interval between tube presentations. Each individual lick was detected by a contact  
582 lickometer and recorded on a computer via DavisPro collection software (Dilog  
583 Instruments and Systems).

584 Mice were adapted to the test chamber and trained to drink from the sipper tubes  
585 for 5 consecutive days as previously described (74, 75). During training, mice were 20-

586 h water deprived. On the first day of training, the mouse was presented with a single  
587 stationary bottle of water for 30 min. On the second day, a tube containing water was  
588 presented but this time the mouse was given 180s to initiate licking and once licking  
589 was recorded the mouse was given 30s access to the tube. At the conclusion of either  
590 the 30s access or the 180s limit, the shutter was closed again for 10s. Each of the 8  
591 tubes, all containing water, was presented 3 times. During the remaining three days of  
592 training, the mouse was given 30 min to initiate licking to one of eight tubes of water.  
593 Once the mouse began licking, it was given 10s to lick before the shutter closed for 10s,  
594 after which a new tube was presented.

595 During testing, animals were allowed to take as many trials as possible in 30 min.  
596 Mice were tested on varying concentrations of sucrose (0,3,10,30,60,100,300,1000  
597 mM), acesulfame K (0,0.5,2,6,8,16,20,32 mM), MSG with 10  $\mu$ M amiloride  
598 (0,25,50,75,100,400,600,800 mM), denatonium benzoate (0,0.1,0.3,1,3,5,10,20 mM),  
599 and NaCl (0,3,10,30,60,100,300,1000 mM), in that order. Each stimulus was presented  
600 in randomized blocks on Monday, Wednesday and Friday in a single week. Animals  
601 were 22-h water deprived for all testing except sucrose, when animals were tested  
602 water replete. Once the animal began licking the tube, they were allowed 10 seconds of  
603 access before the shutter closed.

604 For stimuli tested in the water deprived condition (acesulfame K, MSG + amiloride,  
605 denatonium benzoate, and NaCl), lick ratios were calculated by dividing the average  
606 number of licks at each concentration by the average number of licks to water. For  
607 stimuli tested while the animals were water replete (sucrose) licks scores were  
608 calculated by subtracting the average number of licks at each concentration by the

609 average number of licks to water. These corrections are used to standardize for  
610 individual differences in lick rate and are based on water need. Lick scores and licks  
611 relative to water are compared by repeated measures ANOVA with genotype as  
612 between factors variable and concentration as a repeated measures within factors  
613 variable. Significant interaction terms were followed by Tukey's Honestly Significant  
614 Difference tests. Statistical analyses were performed in Statistica.

## 615 **Solutions**

616 All chemicals were purchased from Sigma Chemical (Sigma-Aldrich, St. Louis,  
617 MO) unless otherwise noted. Tyrode's solution contained 140mM NaCl, 5mM KCl, 3mM  
618  $\text{CaCl}_2$ , 1mM  $\text{MgCl}_2$ , 10mM HEPES, 10mM glucose, and 1mM pyruvate, pH 7.4.  $\text{Ca}^{2+}$ -  
619 free Tyrode's contained 140mM NaCl, 5mM KCl, 2.7mM BAPTA, 2mM EGTA, 10mM  
620 HEPES, 10mM glucose, 1mM pyruvate, pH 7.4. Nominal  $\text{Ca}^{2+}$ -free Tyrode's contained  
621 140mM NaCl, 5mM KCl, 10mM HEPES, 10mM glucose, 1mM pyruvate, pH 7.4. Hi KCl  
622 solution contained 50mM KCl, 90mM NaCl, 3mM  $\text{CaCl}_2$ , 1mM  $\text{MgCl}_2$ , 10mM HEPES,  
623 10mM glucose, 1mM pyruvate, pH 7.4. All taste-solutions, 2 $\mu$ M U73122 (Tocris, Bristol,  
624 United Kingdom), and 2 $\mu$ M thapsigargin (Tocris) were prepared in normal Tyrode's.  
625 Multiple taste stimuli were analyzed for bitter (5mM denatonium benzoate (Den), sweet  
626 (20mM sucralose, 2mM saccharin, 50mM sucrose, 20mM Acesulfame K (Ace K)), and  
627 umami (10mM monopotassium glutamate (MPG)). 50mM sucrose contained 90mM  
628 NaCl instead of 140mM. Salt (250mM sodium chloride, NaCl) and sour (50mM citric  
629 acid, CA, pH4) stimuli were tested using the same protocol as Lewandowski et al (19).

## 630 **Statistics**

631 Analysis of the taste responsiveness was performed using an interactive Chi-  
632 square analysis with Yate's correction for continuity (76). Significant differences were  
633 reported if  $p < 0.05$ . For real-time PCR analyses, a one-way ANOVA with  $p < 0.05$  set as  
634 the limit of significance was used to identify any significant differences between the  
635 relative expression of PLC $\beta$ 2 and PLC $\beta$ 3 in the different papillae types. Comparisons  
636 between two experimental conditions were made using a two-tailed Student's T test with  
637  $p < 0.05$  set as the limit of significance.

### 638 **Colocalization analysis**

639 Image stacks ( $n=5$ , 1  $\mu\text{m}$  each) were acquired from labelled sections obtained  
640 from three different animals and regions of interest (ROI) were drawn to include the  
641 area inside clearly identifiable taste buds. Colocalization analysis was performed on the  
642 ROIs using ImageJ Fiji software (NIH). Colocalization was determined based on  
643 Pearson's coefficient using the Colocalization\_Finder plugin. If the Pearson's coefficient  
644 value was greater than 0.9, we considered it to be 100% colocalization due to the  
645 variability in immunofluorescence intensity. If the Pearson's coefficient was less than  
646 0.05, we considered this to be no colocalization. A Pearson's coefficient higher than  
647 0.05 but lower than 0.9 was considered as partial colocalization.

### 648 **ACKNOWLEDGMENTS**

649 The authors thank Dr. Stefan Roberts at the University of Bristol for comments. This  
650 work was supported by NSF1256950 to KFM. The authors thank Alan Siegel and the  
651 UB North Campus Imaging facility funded by NSF-MRI DBI0923133 for the confocal  
652 images. The authors thank Jhanna Flora for generating our model images.  
653

### 654 **AUTHOR CONTRIBUTIONS**

655 DDB and EDB did live cell imaging, immunohistochemistry, data analysis and  
656 contributed to writing the manuscript. DDB also did infusion experiments. LEM  
657 performed brief-access lick behavior experiments, infusion experiments and data  
658 analysis. KEK performed infusion experiments and data analysis. GCL conceived and

659 analyzed infusion experiments. ARN did immunohistochemistry, qPCR and data  
660 analysis. ZCA and BRK did live cell imaging and data analysis. BTK did  
661 immunohistochemistry. AV did experiments and analyzed data. AMT supervised brief-  
662 access lick behavior, infusion experiments, analyzed and interpreted the data, and  
663 edited the manuscript. KFM conceived and supervised the project, did live cell imaging,  
664 data analysis and wrote the manuscript.

665

666 The authors declare no competing interests.

667

668

669 **REFERENCES**

- 670 1. Chaudhari N & Roper SD (2010) The cell biology of taste. *J Cell Biol* 190(3):285-  
671 296.
- 672 2. Finger TE (2005) Cell types and lineages in taste buds. *Chem Senses* 30 Suppl  
673 1:i54-55.
- 674 3. Lawton DM, Furness DN, Lindemann B, & Hackney CM (2000) Localization of  
675 the glutamate-aspartate transporter, GLAST, in rat taste buds. *Eur J Neurosci*  
676 12(9):3163-3171.
- 677 4. Miyoshi MA, Abe K, & Emori Y (2001) IP(3) receptor type 3 and PLCbeta2 are  
678 co-expressed with taste receptors T1R and T2R in rat taste bud cells. *Chem*  
679 *Senses* 26(3):259-265.
- 680 5. Zhang Y, *et al.* (2003) Coding of sweet, bitter, and umami tastes: different  
681 receptor cells sharing similar signaling pathways. *Cell* 112(3):293-301.
- 682 6. Yan W, *et al.* (2001) Bitter taste transduced by PLC-beta(2)-dependent rise in  
683 IP(3) and alpha-gustducin-dependent fall in cyclic nucleotides. *Am J Physiol Cell*  
684 *Physiol* 280(4):C742-751.
- 685 7. Dutta Banik D, Martin LE, Freichel M, Torregrossa AM, & Medler KF (2018)  
686 TRPM4 and TRPM5 are both required for normal signaling in taste receptor cells.  
687 *Proc Natl Acad Sci U S A* 115(4):E772-E781.
- 688 8. Taruno A, *et al.* (2013) CALHM1 ion channel mediates purinergic  
689 neurotransmission of sweet, bitter and umami tastes. *Nature* 495(7440):223-226.
- 690 9. Liu D & Liman ER (2003) Intracellular Ca<sup>2+</sup> and the phospholipid PIP<sub>2</sub> regulate  
691 the taste transduction ion channel TRPM5. *Proc Natl Acad Sci U S A*  
692 100(25):15160-15165.
- 693 10. Zhang Z, Zhao Z, Margolskee R, & Liman E (2007) The transduction channel  
694 TRPM5 is gated by intracellular calcium in taste cells. *J Neurosci* 27(21):5777-  
695 5786.
- 696 11. Perez CA, *et al.* (2002) A transient receptor potential channel expressed in taste  
697 receptor cells. *Nat Neurosci* 5(11):1169-1176.
- 698 12. Clapp TR, Yang R, Stoick CL, Kinnamon SC, & Kinnamon JC (2004)  
699 Morphologic characterization of rat taste receptor cells that express components  
700 of the phospholipase C signaling pathway. *J Comp Neurol* 468(3):311-321.
- 701 13. Yee CL, Yang R, Bottger B, Finger TE, & Kinnamon JC (2001) "Type III" cells of  
702 rat taste buds: immunohistochemical and ultrastructural studies of neuron-  
703 specific enolase, protein gene product 9.5, and serotonin. *J Comp Neurol*  
704 440(1):97-108.
- 705 14. Simon SA, de Araujo IE, Gutierrez R, & Nicolelis MA (2006) The neural  
706 mechanisms of gustation: a distributed processing code. *Nat Rev Neurosci*  
707 7(11):890-901.
- 708 15. Roper SD (2007) Signal transduction and information processing in mammalian  
709 taste buds. *Pflugers Arch* 454(5):759-776.
- 710 16. Clapp TR, Medler KF, Damak S, Margolskee RF, & Kinnamon SC (2006) Mouse  
711 taste cells with G protein-coupled taste receptors lack voltage-gated calcium  
712 channels and SNAP-25. *BMC Biol* 4:7.



- 713 17. Chang RB, Waters H, & Liman ER (2010) A proton current drives action  
714 potentials in genetically identified sour taste cells. *Proc Natl Acad Sci U S A*  
715 107(51):22320-22325.
- 716 18. Ye W, *et al.* (2016) The K<sup>+</sup> channel KIR2.1 functions in tandem with proton influx  
717 to mediate sour taste transduction. *Proc Natl Acad Sci U S A* 113(2):E229-238.
- 718 19. Lewandowski BC, Sukumaran SK, Margolskee RF, & Bachmanov AA (2016)  
719 Amiloride-Insensitive Salt Taste Is Mediated by Two Populations of Type III Taste  
720 Cells with Distinct Transduction Mechanisms. *J Neurosci* 36(6):1942-1953.
- 721 20. Huang YA, Maruyama Y, Stimac R, & Roper SD (2008) Presynaptic (Type III)  
722 cells in mouse taste buds sense sour (acid) taste. *J Physiol* 586(12):2903-2912.
- 723 21. Huang AL, *et al.* (2006) The cells and logic for mammalian sour taste detection.  
724 *Nature* 442(7105):934-938.
- 725 22. Kataoka S, *et al.* (2008) The candidate sour taste receptor, PKD2L1, is  
726 expressed by type III taste cells in the mouse. *Chem Senses* 33(3):243-254.
- 727 23. Oka Y, Butnaru M, von Buchholtz L, Ryba NJ, & Zuker CS (2013) High salt  
728 recruits aversive taste pathways. *Nature* 494(7438):472-475.
- 729 24. Damak S, *et al.* (2006) Trpm5 null mice respond to bitter, sweet, and umami  
730 compounds. *Chem Senses* 31(3):253-264.
- 731 25. Hisatsune C, *et al.* (2007) Abnormal Taste Perception in Mice Lacking the Type 3  
732 Inositol 1,4,5-Trisphosphate Receptor. *J Biol Chem* 282(51):37225-37231.
- 733 26. Damak S, *et al.* (2003) Detection of sweet and umami taste in the absence of  
734 taste receptor T1r3. *Science* 301(5634):850-853.
- 735 27. Danilova V, Damak S, Margolskee RF, & Hellekant G (2006) Taste responses to  
736 sweet stimuli in alpha-gustducin knockout and wild-type mice. *Chem Senses*  
737 31(6):573-580.
- 738 28. Dotson CD, Roper SD, & Spector AC (2005) PLCbeta2-independent behavioral  
739 avoidance of prototypical bitter-tasting ligands. *Chem Senses* 30(7):593-600.
- 740 29. Matsumoto I, Ohmoto M, Narukawa M, Yoshihara Y, & Abe K (2011) Skn-1a  
741 (Pou2f3) specifies taste receptor cell lineage. *Nat Neurosci* 14(6):685-687.
- 742 30. Yee KK, Sukumaran SK, Kotha R, Gilbertson TA, & Margolskee RF (2011)  
743 Glucose transporters and ATP-gated K<sup>+</sup> (KATP) metabolic sensors are present  
744 in type 1 taste receptor 3 (T1r3)-expressing taste cells. *Proc Natl Acad Sci U S A*  
745 108(13):5431-5436.
- 746 31. Maruyama Y, Pereira E, Margolskee RF, Chaudhari N, & Roper SD (2006)  
747 Umami responses in mouse taste cells indicate more than one receptor. *J*  
748 *Neurosci* 26(8):2227-2234.
- 749 32. Hacker K, Laskowski A, Feng L, Restrepo D, & Medler K (2008) Evidence for two  
750 populations of bitter responsive taste cells in mice. *J Neurophysiol* 99(3):1503-  
751 1514.
- 752 33. Clapp TR, Stone LM, Margolskee RF, & Kinnamon SC (2001)  
753 Immunocytochemical evidence for co-expression of Type III IP3 receptor with  
754 signaling components of bitter taste transduction. *BMC Neurosci* 2:6.
- 755 34. DeFazio RA, *et al.* (2006) Separate populations of receptor cells and presynaptic  
756 cells in mouse taste buds. *J Neurosci* 26(15):3971-3980.

- 757 35. Shandilya J, Gao Y, Nayak TK, Roberts SG, & Medler KF (2016) AP1  
758 transcription factors are required to maintain the peripheral taste system. *Cell*  
759 *Death Dis* 7(10):e2433.
- 760 36. Medler KF, Margolskee RF, & Kinnamon SC (2003) Electrophysiological  
761 characterization of voltage-gated currents in defined taste cell types of mice. *J*  
762 *Neurosci* 23(7):2608-2617.
- 763 37. Sukumaran SK, *et al.* (2017) Whole transcriptome profiling of taste bud cells.  
764 *Scientific reports* 7(1):7595.
- 765 38. Richter TA, Caicedo A, & Roper SD (2003) Sour taste stimuli evoke Ca<sup>2+</sup> and  
766 pH responses in mouse taste cells. *J Physiol* 547(Pt 2):475-483.
- 767 39. Courtney E Wilson TF, Sue C Kinnamon (2017) Type III cells in anterior taste  
768 fields are more immunohistochemically diverse than those of posterior taste  
769 fields in mice. *Chemical Senses* bxx055.
- 770 40. Yang R, Crowley HH, Rock ME, & Kinnamon JC (2000) Taste cells with  
771 synapses in rat circumvallate papillae display SNAP-25-like immunoreactivity. *J*  
772 *Comp Neurol* 424(2):205-215.
- 773 41. King CT, Garcea M, & Spector AC (2000) Glossopharyngeal nerve regeneration  
774 is essential for the complete recovery of quinine-stimulated oromotor rejection  
775 behaviors and central patterns of neuronal activity in the nucleus of the solitary  
776 tract in the rat. *J Neurosci* 20(22):8426-8434.
- 777 42. King CT, Travers SP, Rowland NE, Garcea M, & Spector AC (1999)  
778 Glossopharyngeal nerve transection eliminates quinine-stimulated fos-like  
779 immunoreactivity in the nucleus of the solitary tract: implications for a functional  
780 topography of gustatory nerve input in rats. *J Neurosci* 19(8):3107-3121.
- 781 43. Stratford JM & Finger TE (2011) Central representation of postingestive  
782 chemosensory cues in mice that lack the ability to taste. *J Neurosci* 31(25):9101-  
783 9110.
- 784 44. Stratford JM & Thompson JA (2016) MSG-Evoked c-Fos Activity in the Nucleus  
785 of the Solitary Tract Is Dependent upon Fluid Delivery and Stimulation  
786 Parameters. *Chem Senses* 41(3):211-220.
- 787 45. Stratford JM, Thompson JA, & Finger TE (2017) Immunocytochemical  
788 organization and sour taste activation in the rostral nucleus of the solitary tract of  
789 mice. *J Comp Neurol* 525(2):271-290.
- 790 46. Ruiz-Avila L, Wong GT, Damak S, & Margolskee RF (2001) Dominant loss of  
791 responsiveness to sweet and bitter compounds caused by a single mutation in  
792 alpha -gustducin. *Proc Natl Acad Sci U S A* 98(15):8868-8873.
- 793 47. Zukerman S, Glendinning JI, Margolskee RF, & Sclafani A (2009) T1R3 taste  
794 receptor is critical for sucrose but not Polycose taste. *Am J Physiol Regul Integr*  
795 *Comp Physiol* 296(4):R866-876.
- 796 48. Treesukosol Y, Smith KR, & Spector AC (2011) Behavioral evidence for a  
797 glucose polymer taste receptor that is independent of the T1R2+3 heterodimer in  
798 a mouse model. *J Neurosci* 31(38):13527-13534.
- 799 49. Treesukosol Y & Spector AC (2012) Orosensory detection of sucrose, maltose,  
800 and glucose is severely impaired in mice lacking T1R2 or T1R3, but Polycose  
801 sensitivity remains relatively normal. *Am J Physiol Regul Integr Comp Physiol*  
802 303(2):R218-235.

- 803 50. Dvoryanchikov G, *et al.* (2017) Transcriptomes and neurotransmitter profiles of  
804 classes of gustatory and somatosensory neurons in the geniculate ganglion. *Nat*  
805 *Commun* 8(1):760.
- 806 51. Treesukosol Y, Blonde GD, & Spector AC (2009) T1R2 and T1R3 subunits are  
807 individually unnecessary for normal affective licking responses to Polycose:  
808 implications for saccharide taste receptors in mice. *Am J Physiol Regul Integr*  
809 *Comp Physiol* 296(4):R855-865.
- 810 52. Chaudhari N, Landin AM, & Roper SD (2000) A metabotropic glutamate receptor  
811 variant functions as a taste receptor. *Nat Neurosci* 3(2):113-119.
- 812 53. Chaudhari N, Maruyama Y, Roper S, & Trubey K (2005) Multiple pathways for  
813 signaling glutamate taste in rodents. *Chem Senses* 30 Suppl 1:i29-i30.
- 814 54. Chaudhari N, Pereira E, & Roper SD (2009) Taste receptors for umami: the case  
815 for multiple receptors. *Am J Clin Nutr* 90(3):738S-742S.
- 816 55. Delay ER, Hernandez NP, Bromley K, & Margolskee RF (2006) Sucrose and  
817 monosodium glutamate taste thresholds and discrimination ability of T1R3  
818 knockout mice. *Chem Senses* 31(4):351-357.
- 819 56. Eddy MC, Eschle BK, & Delay ER (2017) Comparison of the Tastes of L-Alanine  
820 and Monosodium Glutamate in C57BL/6J Wild Type and T1r3 Knockout Mice.  
821 *Chem Senses* 42(7):563-573.
- 822 57. Pal Choudhuri S, Delay RJ, & Delay ER (2015) L-Amino Acids Elicit Diverse  
823 Response Patterns in Taste Sensory Cells: A Role for Multiple Receptors. *PLoS*  
824 *One* 10(6):e0130088.
- 825 58. Pal Choudhuri S, Delay RJ, & Delay ER (2016) Metabotropic glutamate receptors  
826 are involved in the detection of IMP and L-amino acids by mouse taste sensory  
827 cells. *Neuroscience* 316:94-108.
- 828 59. Stone LM, Barrows J, Finger TE, & Kinnamon SC (2007) Expression of T1Rs  
829 and gustducin in palatal taste buds of mice. *Chem Senses* 32(3):255-262.
- 830 60. Tomchik SM, Berg S, Kim JW, Chaudhari N, & Roper SD (2007) Breadth of  
831 tuning and taste coding in mammalian taste buds. *J Neurosci* 27(40):10840-  
832 10848.
- 833 61. Gilbertson TA, Boughter JD, Jr., Zhang H, & Smith DV (2001) Distribution of  
834 gustatory sensitivities in rat taste cells: whole-cell responses to apical chemical  
835 stimulation. *J Neurosci* 21(13):4931-4941.
- 836 62. Caicedo A, Kim KN, & Roper SD (2002) Individual mouse taste cells respond to  
837 multiple chemical stimuli. *J Physiol* 544(Pt 2):501-509.
- 838 63. Hegg CC, Jia C, Chick WS, Restrepo D, & Hansen A (2010) Microvillous cells  
839 expressing IP3 receptor type 3 in the olfactory epithelium of mice. *Eur J Neurosci*  
840 32(10):1632-1645.
- 841 64. Han SK, Mancino V, & Simon MI (2006) Phospholipase Cbeta 3 mediates the  
842 scratching response activated by the histamine H1 receptor on C-fiber  
843 nociceptive neurons. *Neuron* 52(4):691-703.
- 844 65. Xie W, *et al.* (1999) Genetic alteration of phospholipase C beta3 expression  
845 modulates behavioral and cellular responses to mu opioids. *Proc Natl Acad Sci U*  
846 *S A* 96(18):10385-10390.

- 847 66. Hacker K & Medler KF (2008) Mitochondrial calcium buffering contributes to the  
848 maintenance of Basal calcium levels in mouse taste cells. *J Neurophysiol*  
849 100(4):2177-2191.
- 850 67. Laskowski AI & Medler KF (2009) Sodium-calcium exchangers contribute to the  
851 regulation of cytosolic calcium levels in mouse taste cells. *J Physiol* 587(Pt  
852 16):4077-4089.
- 853 68. Maliphol AB, Garth DJ, & Medler KF (2013) Diet-induced obesity reduces the  
854 responsiveness of the peripheral taste receptor cells. *PLoS One* 8(11):e79403.
- 855 69. Rebello MR, Maliphol AB, & Medler KF (2013) Ryanodine Receptors Selectively  
856 Interact with L Type Calcium Channels in Mouse Taste Cells. *PLoS One*  
857 8(6):e68174.
- 858 70. Rebello MR & Medler KF (2010) Ryanodine receptors selectively contribute to  
859 the formation of taste-evoked calcium signals in mouse taste cells. *Eur J*  
860 *Neurosci* 32(11):1825-1835.
- 861 71. Szebenyi SA, Laskowski AI, & Medler KF (2010) Sodium/calcium exchangers  
862 selectively regulate calcium signaling in mouse taste receptor cells. *J*  
863 *Neurophysiol* 104(1):529-538.
- 864 72. Bartel DL, Sullivan SL, Lavoie EG, Sevigny J, & Finger TE (2006) Nucleoside  
865 triphosphate diphosphohydrolase-2 is the ecto-ATPase of type I cells in taste  
866 buds. *J Comp Neurol* 497(1):1-12.
- 867 73. Harrer MI & Travers SP (1996) Topographic organization of Fos-like  
868 immunoreactivity in the rostral nucleus of the solitary tract evoked by gustatory  
869 stimulation with sucrose and quinine. *Brain Res* 711(1-2):125-137.
- 870 74. Martin LE, *et al.* (2017) Salivary proteins alter taste-guided behaviors and taste  
871 nerve signaling in rat. *Physiol Behav* 184:150-161.
- 872 75. Torregrossa AM, *et al.* (2014) Induction of salivary proteins modifies measures of  
873 both orosensory and postingestive feedback during exposure to a tannic acid  
874 diet. *PLoS One* 9(8):e105232.
- 875 76. Preacher KJ (2001) Calculation for the chi-square test: An interactive calculation  
876 tool for chi-square tests of goodness of fit and independence [Computer  
877 software]. . p Available from <http://quantpsy.org>.
- 878

879 **FIGURE LEGENDS**

880 **Figure 1. Current taste cell models and experimental setup.** A) Current models of  
881 the signal transduction pathways in Type II cells (left) that respond to bitter, sweet, and  
882 umami stimuli as well as Type III cells (right) that respond to sour and salty stimuli. B)  
883 Example of an isolated taste cell that was stimulated with MPG (10mM) and KCl  
884 (50mM). The DIC image is shown first, followed by image of Fura 2-AM loading. The  
885 next three images show the ratio (340/380) at different time points as the cell is  
886 stimulated. The corresponding calcium ( $\text{Ca}^{2+}$ ) changes are shown in 1C.

887

888 **Figure 2. Loss of  $\text{IP}_3\text{R3}$  causes a reduction, but not abolishment, of taste cell**  
889 **sensitivity to different taste stimuli.** Chi square analysis with Yate's correction for  
890 continuity was used to compare the frequency of evoked  $\text{Ca}^{2+}$  responses to different  
891 taste stimuli between wild type (WT) and  $\text{IP}_3\text{R3-KO}$  (KO) mice. A) Table of the mouse  
892 line, number of mice tested, number of cells tested and number of responses recorded.  
893 The P value for each comparison between WT and  $\text{IP}_3\text{R3-GFP-KO}$  is shown as well as  
894 the percent response value. These data include all cells from  $\text{IP}_3\text{R3-GFP-KO}$  mice,  
895 both GFP+ and GFP-. B) Graph shows the percentage of overall responsiveness to  
896 stimuli for taste cells from the CV, Fol and Fun papillae in WT and  $\text{IP}_3\text{R3-KO}$ . The  
897 responsiveness to multiple stimuli was evaluated and is shown for CV (C), FOL (D) and  
898 FUN (E), Specific numbers and P values for each are shown in Figure S3. (\*,  $p < 0.05$ ; \*\*,  
899  $p < 0.01$ ; \*\*\*,  $p < 0.001$ ).

900

901 **Figure 3. Taste-evoked Ca<sup>2+</sup> release in IP<sub>3</sub>R3-KO mice is dependent upon PLC**  
902 **activity and Ca<sup>2+</sup> release from internal stores.** Open columns represent the time that  
903 the taste stimulus is presented. The application of Ca<sup>2+</sup> free Tyrode's is indicated by the  
904 dashed lines. The stimulus presented during this time is also in Ca<sup>2+</sup> free Tyrode's.  
905 The gray hatched columns represent the application of either thapsigargin or U73122,  
906 both of which are irreversible inhibitors. A) Bitter-evoked taste responses (5mM Den)  
907 persist in the absence of extracellular calcium (Ca<sup>2+</sup>-free) and are abolished by the  
908 SERCA pump inhibitor thapsigargin (B) as well as the PLC blocker U73122 (C). D)  
909 Responses to sweet stimuli (20mM sucrose) persist in Ca<sup>2+</sup>-free and are abolished by  
910 thapsigargin (E) and U73122 (F). G) Umami stimuli (10mM MPG) persist in Ca<sup>2+</sup>-free  
911 and were abolished by thapsigargin (H) and U73122 (I). Individual data points are  
912 shown in Figure S4.

913

914 **Figure 4. Expression of PLCβ3 in taste cells.** Laser scanning confocal micrographs  
915 (LSCMs, stack of 5 slices, 1μm each) of PLCβ3 immunostaining in the IP<sub>3</sub>R3-KO-GFP  
916 mice reveals that PLCβ3 is expressed in a separate population from the GFP positive  
917 taste cells in the CV (A, n=5), Fol (B, n=3) and Fun papillae (C, n=4). Scale bar=20μM.  
918 D) Co-localization analysis is shown.

919

920 **Figure 5. Some Type III cells respond to bitter, sweet and umami stimuli.**

921 A-C) Representative traces of taste cells that responded to bitter, sweet and/or umami  
922 stimuli and Hi KCl (50mM) depolarization with Ca<sup>2+</sup> signals. Some cells responded to 1  
923 stimulus while others responded to multiple stimuli. D) Representative trace of taste

924 cells from IP<sub>3</sub>R3-KO mice that responded to 50mM citric acid (CA), 50mM KCl, bitter  
925 (5mM denatonium), sweet (20mM sucralose) and umami (10mM monopotassium  
926 glutamate, MPG) stimuli. E) Representative trace of a separate subset of cells that  
927 responded to 250mM NaCl, 50mM citric acid (CA) and 50mM KCl but were not sensitive  
928 to the bitter, sweet, umami stimuli tested. F) Summary of taste cells from IP<sub>3</sub>R3-KO  
929 mice that responded to 50mM KCl with a Ca<sup>2+</sup> signal (n=20), 25% only responded to  
930 CA, 35% responded to CA and NaCl, and 40% responded to CA and bitter, sweet  
931 and/or umami stimuli (B,U,S) while no cells responded to all the taste stimuli. G) The  
932 overall responsiveness of taste cells from the CV, Fol and Fun papillae of the IP<sub>3</sub>R3-KO  
933 mice and WT mice was measured. This is defined as the percentage of stimulated cells  
934 that responded to at least one stimulus. The percentage of DR cells in both lines was  
935 also measured using the criteria that the cell responded to at least one stimulus AND  
936 50mM KCl with Ca<sup>2+</sup> signals. The overall responsiveness to taste stimuli was  
937 significantly reduced in the IP<sub>3</sub>R3-KO mice compared to controls (\*\*,p<0.01) while the  
938 number of responsive DR cells did not change in the absence of IP<sub>3</sub>R3. H) The  
939 percentage of responsiveness in the DR taste cells to different taste stimuli in the WT  
940 and IP<sub>3</sub>R3-KO mice. Chi-square analysis found no significant differences.

941

942 **Figure 6. PLCβ3 is required for the detection of bitter, sweet and umami stimuli.**

943 Chi square analysis with Yate's correction for continuity was used to compare the  
944 frequency of evoked Ca<sup>2+</sup> responses to different taste stimuli between wild type (WT)  
945 and PLCβ3-KO (KO) mice. A) Table of the mouse line, number of mice tested, number  
946 of cells tested and number of responses recorded. The P value for each comparison

947 between WT and PLC $\beta$ 3-KO is shown as well as the percent response value. B) The  
948 overall responsiveness and the percentage of DR taste cells from the CV, Fol and Fun  
949 papillae of the PLC $\beta$ 3-KO mice and WT mice was measured. Both the overall  
950 responsiveness to taste stimuli and the number of DR cells were significantly reduced in  
951 the PLC $\beta$ 3-KO mice compared to controls. The responsiveness to multiple stimuli was  
952 evaluated and is shown for CV (C), FOL (D) and FUN (E). Specific numbers and P  
953 values for each are shown in Figure S8. (\*,  $p < 0.05$ ; \*\*,  $p < 0.01$ ; \*\*\*,  $p < 0.001$ ).

954

955 **Figure 7. Loss of PLC $\beta$ 3 or IP $_3$ R3 causes deficits in the taste-evoked neural**  
956 **activity in the nucleus of solitary tract.**

957 Oral infusion of bitter (quinine) and water elicited c-Fos immunoreactivity in the  
958 intermediate rostral nucleus tractus solitarius (IRNTS). (A, B) Loss of either PLC $\beta$ 3  
959 (PLC $\beta$ 3-KO) or IP $_3$ R3 (IP $_3$ R3-KO) caused a significant reduction in the c-Fos  
960 immunoreactivity in the IRNTS compared to WT mice. The residual c-Fos labeling in  
961 each of the KO mice was comparable to the c-Fos labelling generated by water infusion.  
962 For all experiments, 3 mice of each genotype were used (\*\*\*,  $p < 0.001$ ; \*\*,  $p < 0.01$ ). The  
963 red outlined area denotes the analyzed region for each. Data were analyzed with a one  
964 way ANOVA with follow up Student's t tests to identify individual differences.  
965 Significance level was set at  $p < 0.05$ . C) A schematic diagram showing the analysis  
966 region in the hindbrain that was analyzed.

967

968 **Figure 8. Loss of PLC $\beta$ 3 or IP $_3$ R3 affects behavioral responses to taste stimuli.**

969 Lick data ( $\pm$ standard deviation) from brief-access behavioral tests compare the



970 responses of IP<sub>3</sub>R3-KO (red line) and PLCβ3-KO (pink line) to WT (IP<sub>3</sub>R3-WT, black  
971 line; PLCβ3-WT, blue line). A) Lick ratios (stimulus/water) of the WT mice for the bitter  
972 stimulus denatonium (0, 0.1, 0.3, 1, 3, 5, 10, 20mM) were significantly different from the  
973 IP<sub>3</sub>R3-KO and PLCβ3-KO responses. B) Lick ratios of the WT mice for the umami  
974 stimulus monosodium glutamate + 10μM amiloride (MSG, 0, 25, 50, 75, 100, 400, 600,  
975 800mM) were significantly different from the IP<sub>3</sub>R3-KO and PLCβ3-KO mice. C) Lick  
976 ratios of the WT mice for the artificial sweetener acesulfame K (0, 0.5, 2, 6, 8, 16, 20,  
977 32mM) were significantly different from the IP<sub>3</sub>R3-KO and PLCβ3-KO mice. D) Lick  
978 scores (stimulus-water) of the WT mice for sucrose (0, 3, 10, 30, 60, 100, 300, 1000mM)  
979 were significantly different from the IP<sub>3</sub>R3-KO and PLCβ3-KO responses. E) No  
980 significant differences were detected between the WT and KO mice for any  
981 concentration of NaCl (0, 3, 10, 30, 60, 100, 300, 1000mM) tested. For all experiments,  
982 5 mice of each genotype were used (\*\*\*, p<0.001; \*\*, p<0.01; \*, p<0.05). Data were  
983 compared by repeated measures ANOVA. Significant interaction terms were followed  
984 by Tukey's Honestly Significant Difference tests.  
985

**A**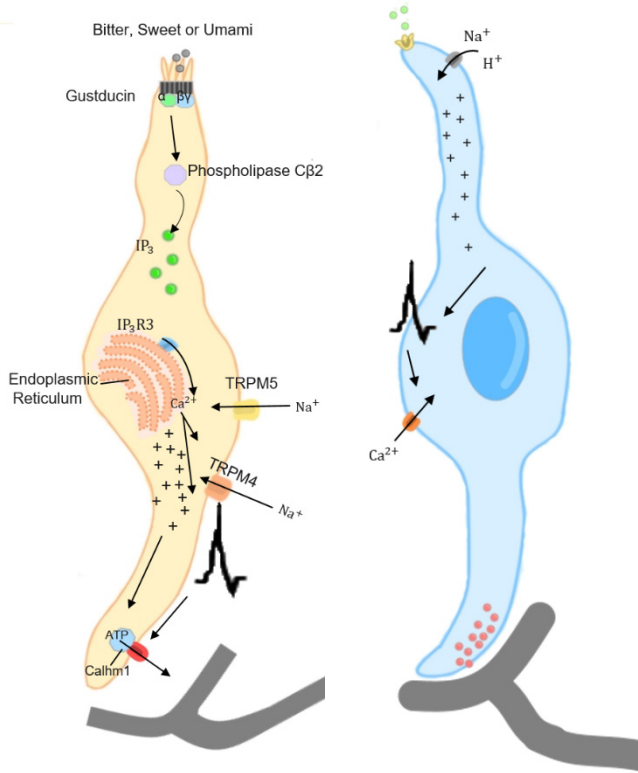**B**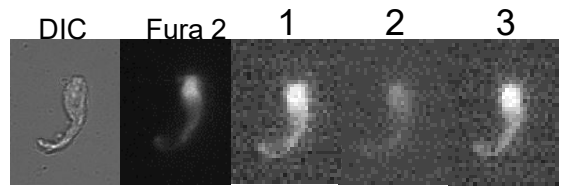**C**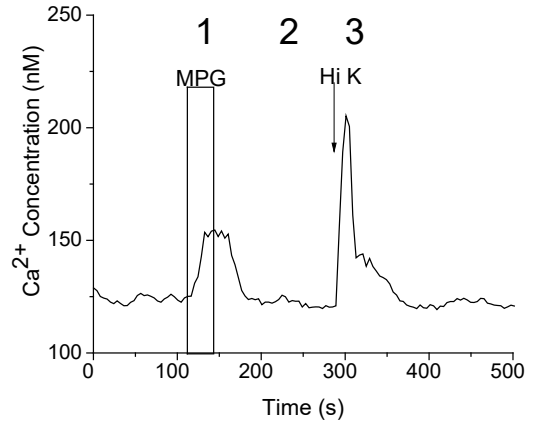

FIGURE 1

**A**

| Papillae type | Mouse genotype  | Cells tested | # of Resp | P value  | % value |
|---------------|-----------------|--------------|-----------|----------|---------|
| All cells     | WT (n=105 mice) | 407          | 259       | P<0.0001 | 63.6    |
|               | KO (n=115 mice) | 690          | 213       |          | 30.9    |
| CV            | WT (n=63 mice)  | 250          | 159       | P=0.0003 | 63.6    |
|               | KO (n=70 mice)  | 443          | 172       |          | 38.8    |
| FOL           | WT (n=28 mice)  | 53           | 29        | P=0.44   | 54.7    |
|               | KO (n=37 mice)  | 123          | 52        |          | 42.3    |
| FUN           | WT (n=32 mice)  | 104          | 71        | P=0.17   | 68.2    |
|               | KO (n=30 mice)  | 124          | 61        |          | 49.2    |

**B**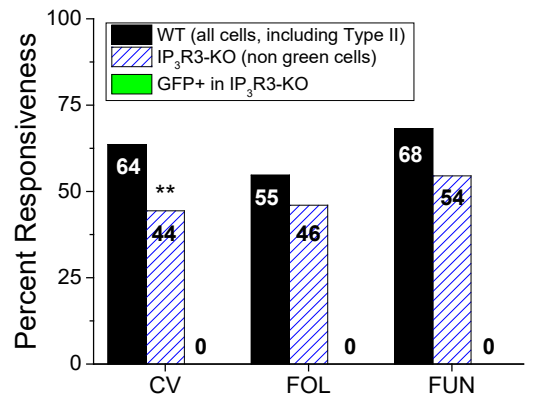**C**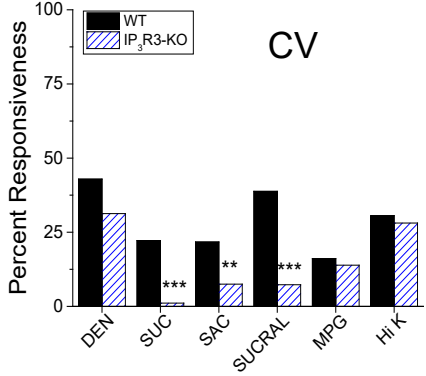**D**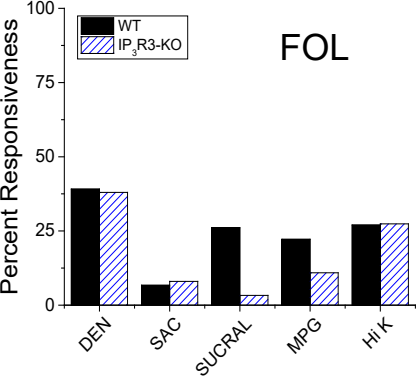**E**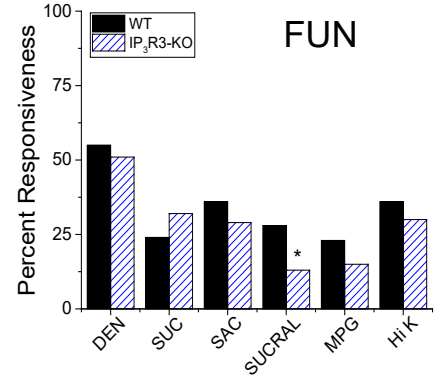

FIGURE 2

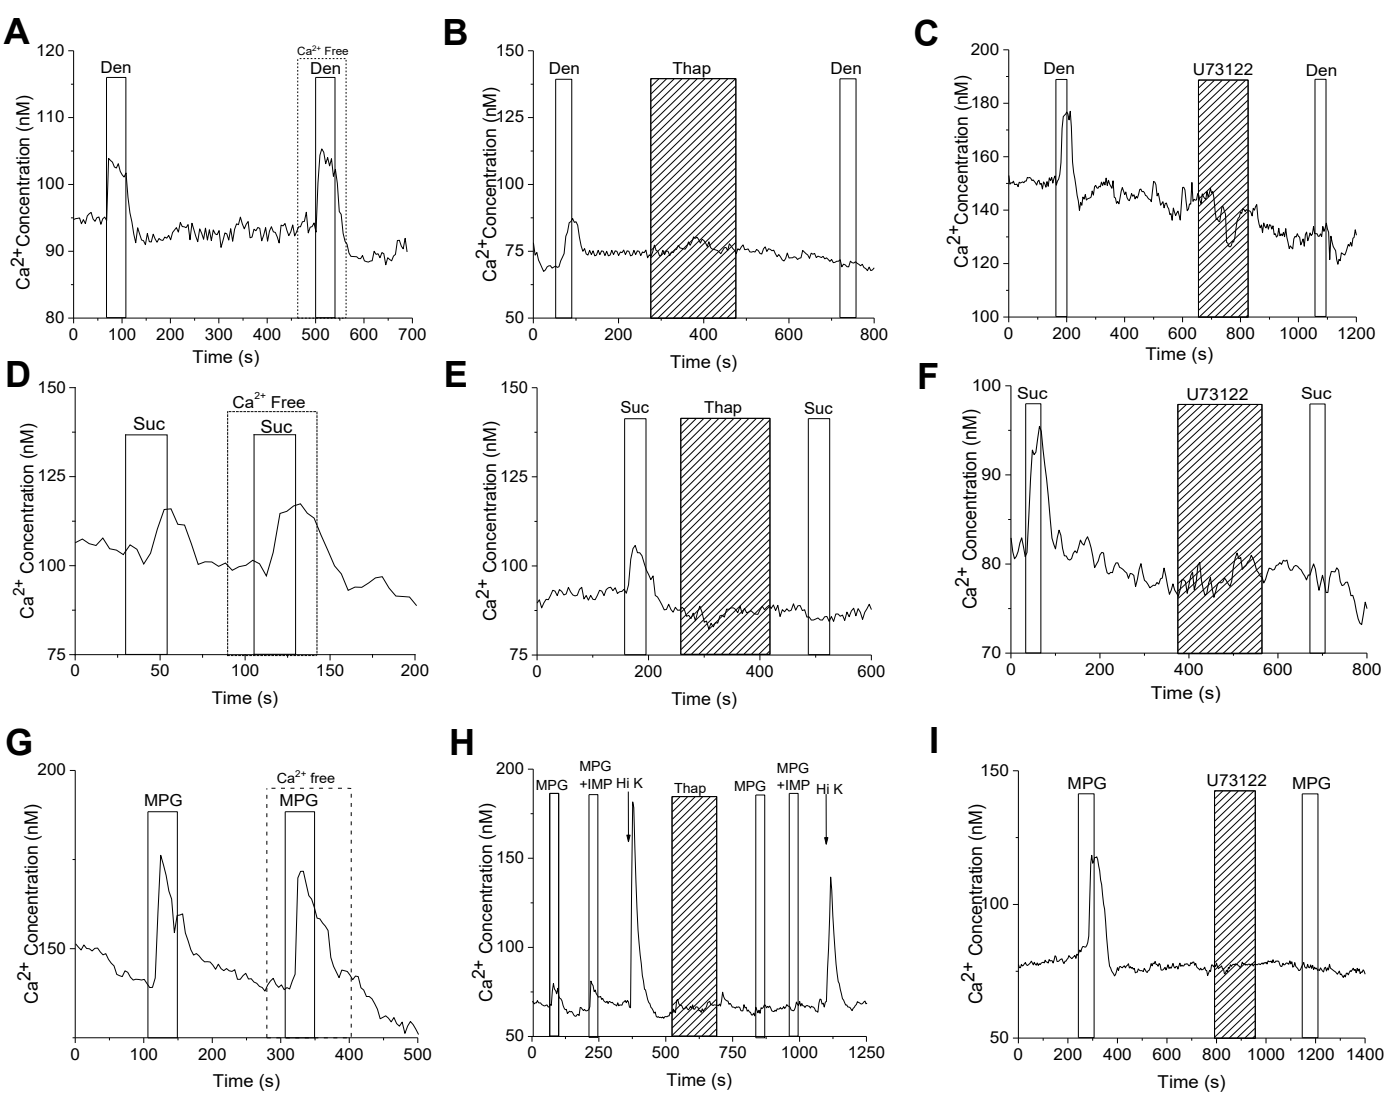

FIGURE 3

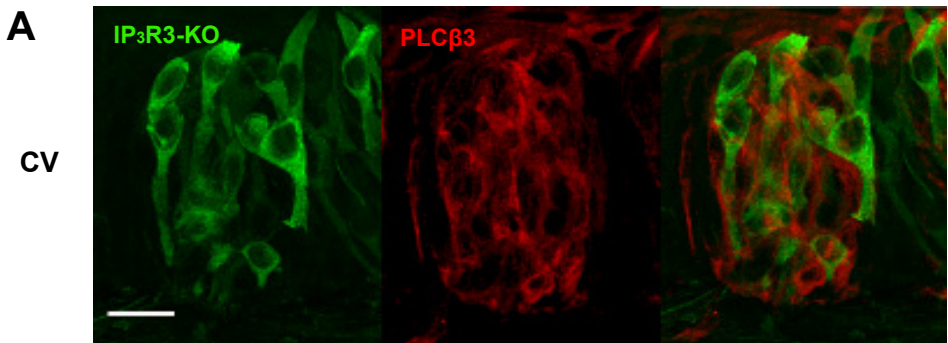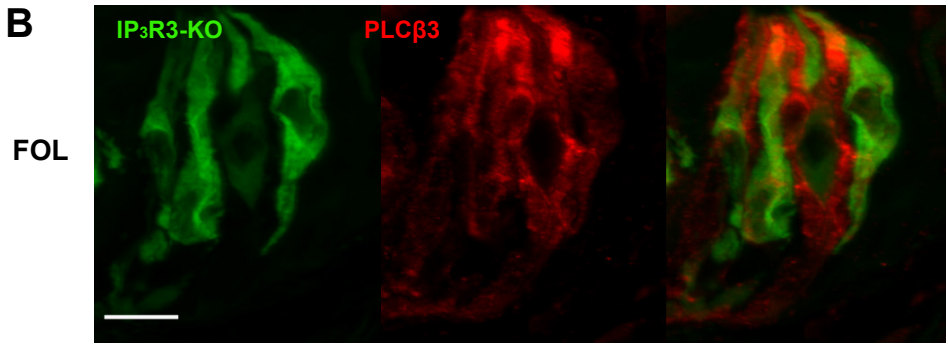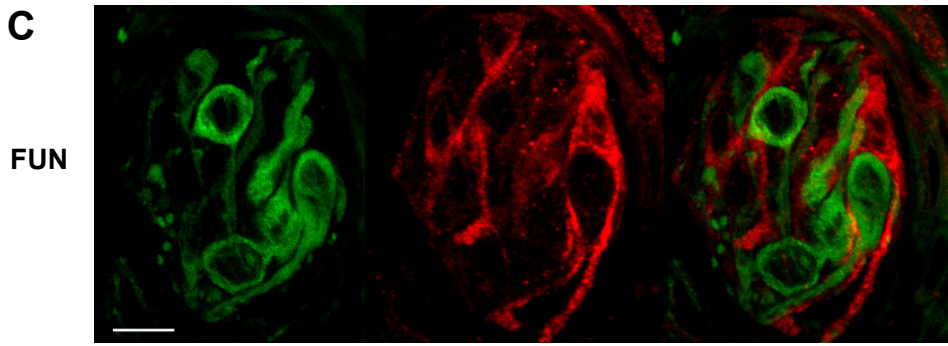

**D**

| Comparison        | Average overlap,<br>standard deviation |
|-------------------|----------------------------------------|
| GFP vs anti-PLCβ3 | 0.03±0.02                              |

FIGURE 4

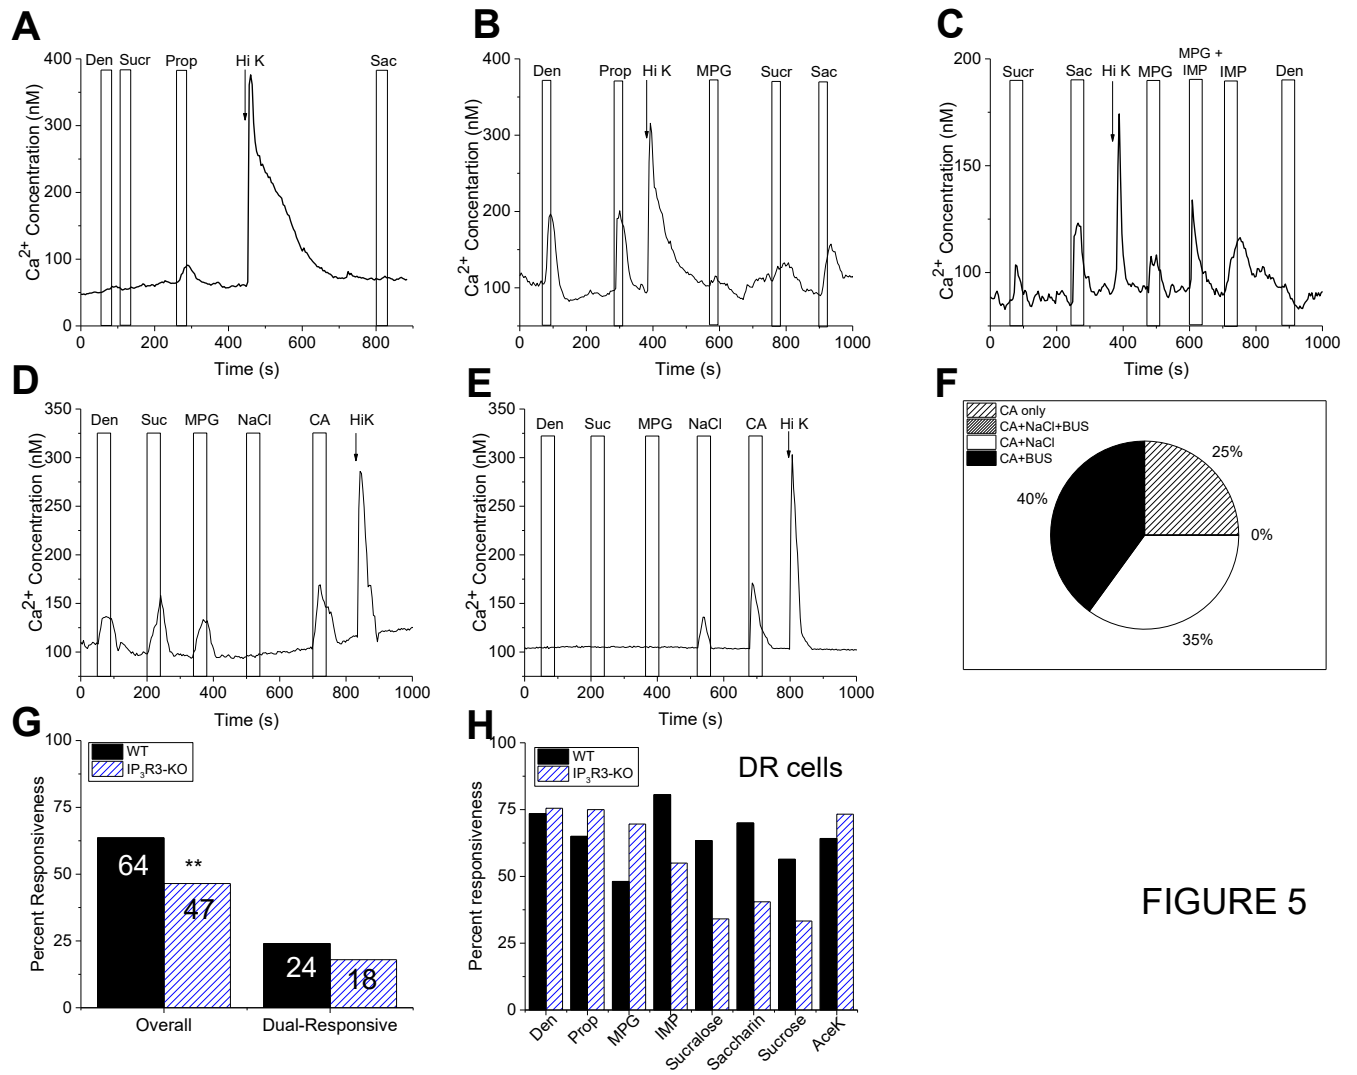

FIGURE 5

**A**

| Papillae type | Mouse genotype | Cells tested | # of Resp. | P value | % value |
|---------------|----------------|--------------|------------|---------|---------|
| All cells     | WT (n=53 mice) | 577          | 344        | P=0.002 | 59.6    |
|               | KO (n=68 mice) | 375          | 155        |         | 41.3    |
| CV            | WT (n=40 mice) | 221          | 137        | P=0.246 | 61.9    |
|               | KO (n=55 mice) | 138          | 68         |         | 49.2    |
| FOL           | WT (n=40 mice) | 243          | 136        | P=0.039 | 55.9    |
|               | KO (n=34 mice) | 120          | 43         |         | 35.8    |
| FUN           | WT (n=35 mice) | 113          | 71         | P=0.035 | 62.8    |
|               | KO (n=48 mice) | 117          | 44         |         | 37.6    |

**B**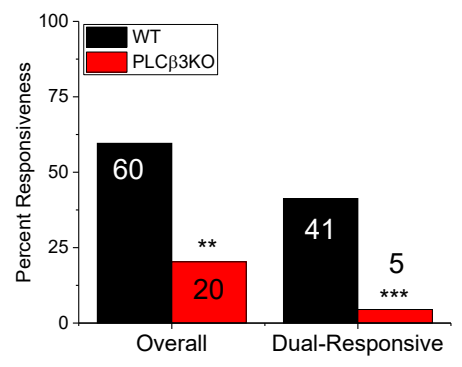**C**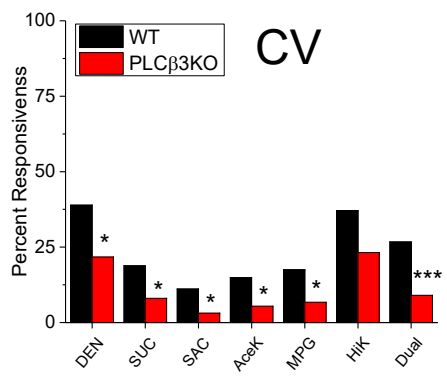**D**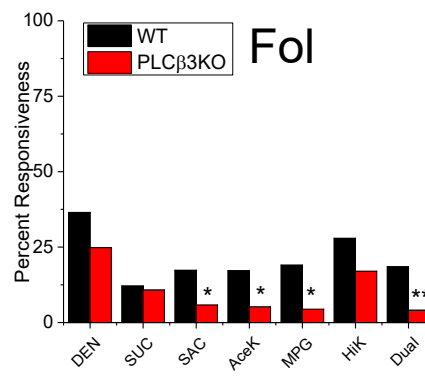**E**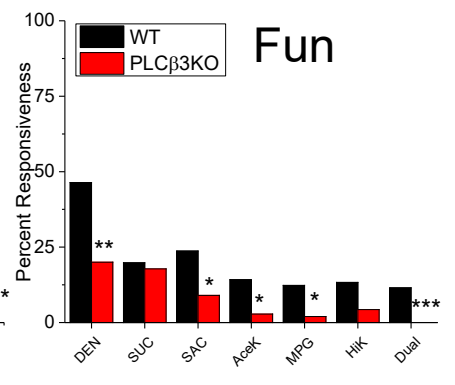

FIGURE 6

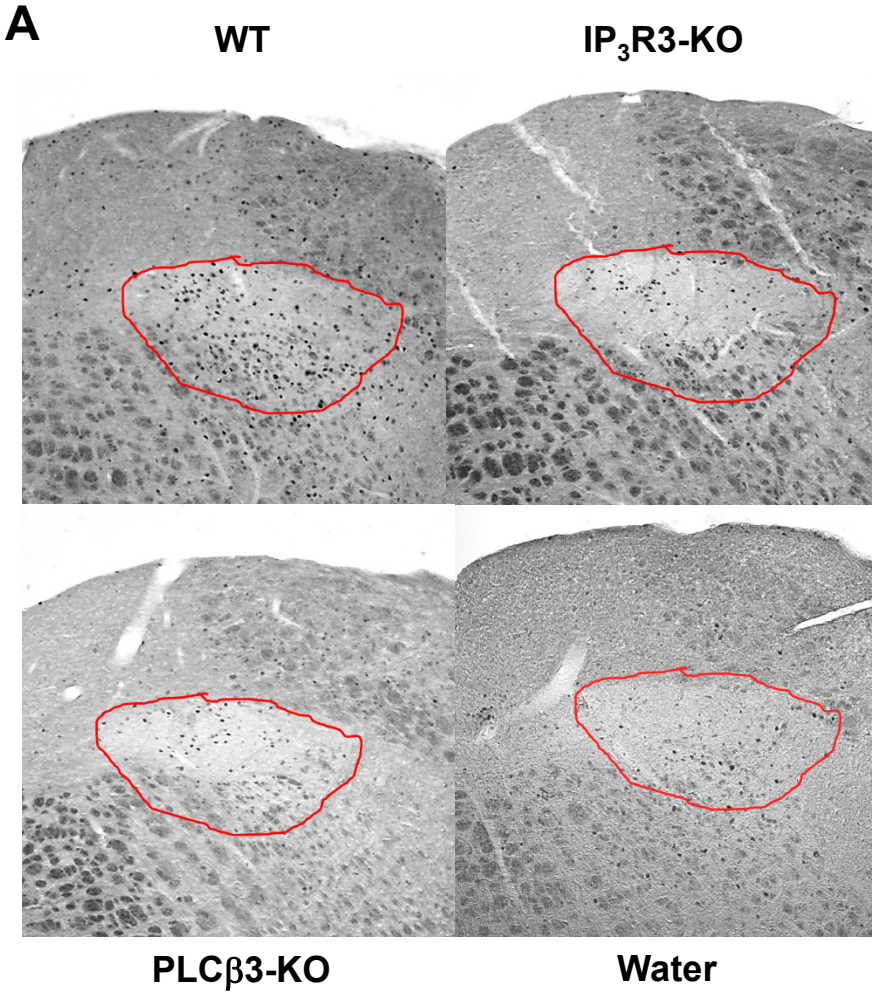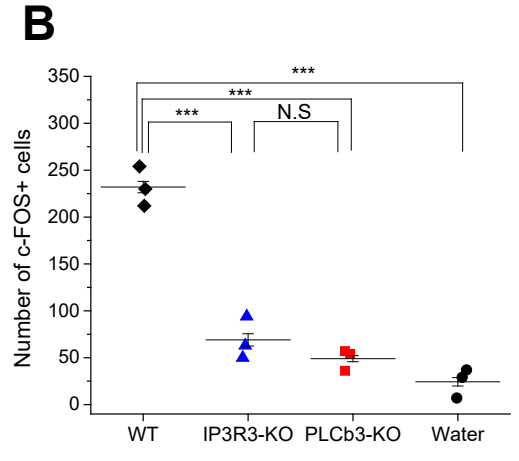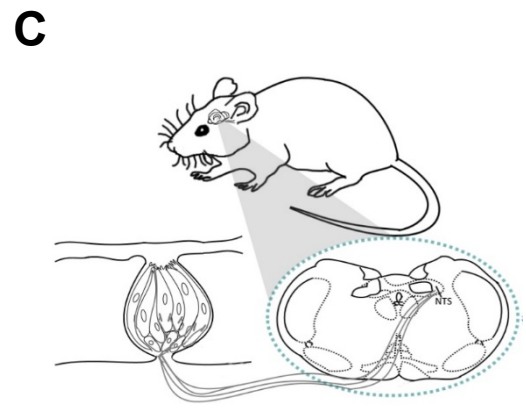

**FIGURE 7**



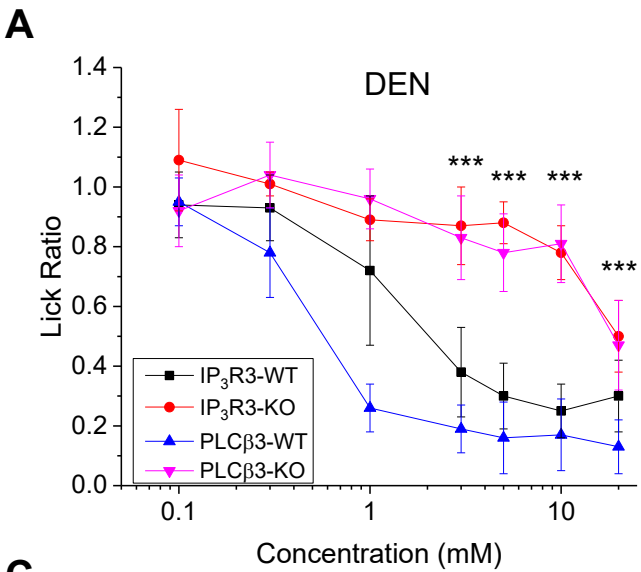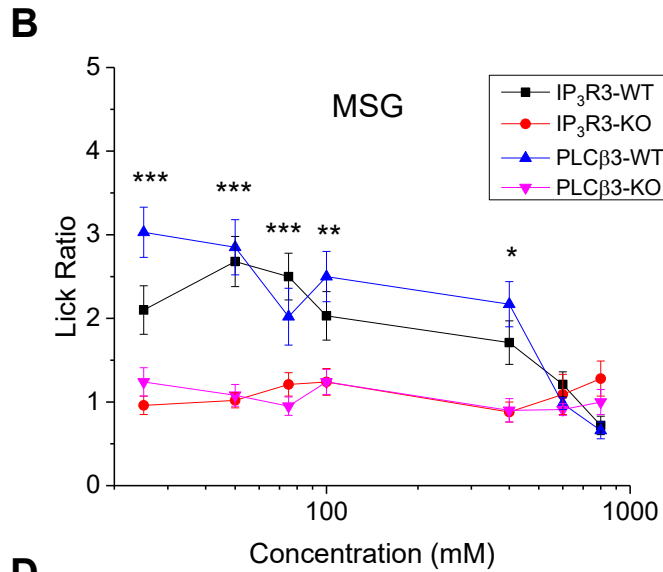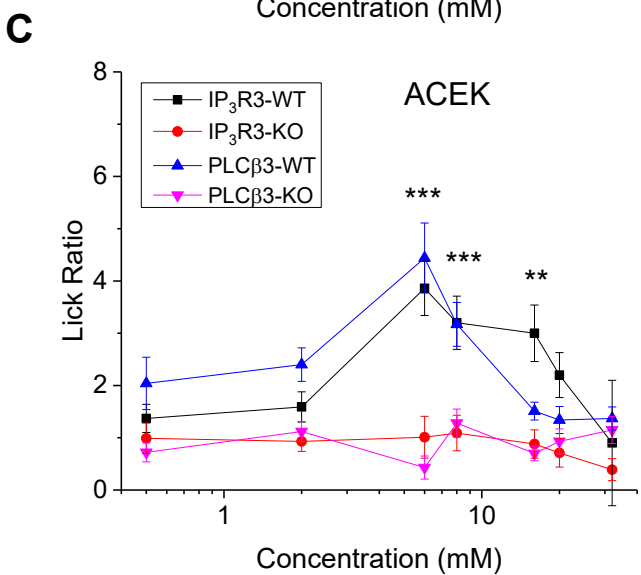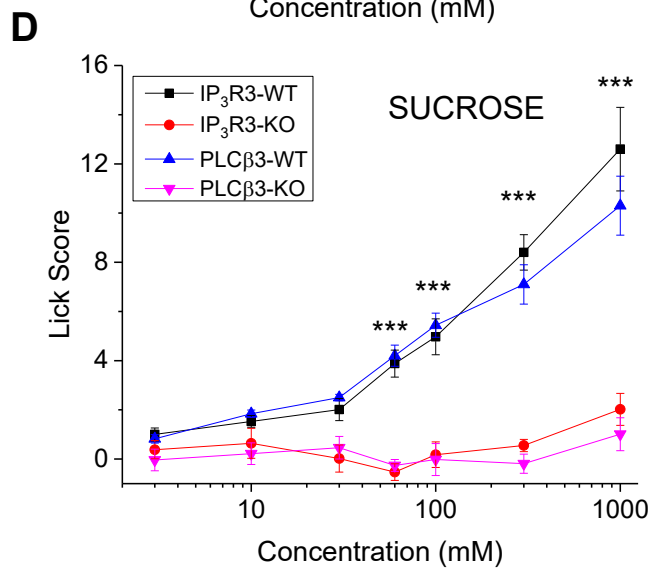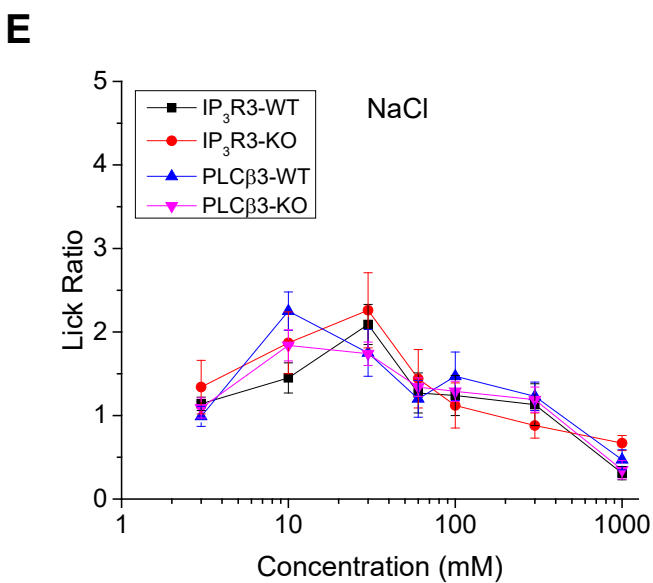

FIGURE 8

| <b>Cell populations</b>         | <b>Identifiers/Classification</b>                                                                                                                          |
|---------------------------------|------------------------------------------------------------------------------------------------------------------------------------------------------------|
| IP <sub>3</sub> R3-KO-GFP cells | Type II cells with GFP expression replacing IP <sub>3</sub> R3 expression.                                                                                 |
| WT cells                        | All cells that were tested and/or responded to stimuli, including Type II cells, Type III cells, other cells.                                              |
| IP <sub>3</sub> R3-KO cells     | Taste cells from mice that lack functional Type II cells and do not express GFP. These include Type III cells and other cells.                             |
| Dual-responsive cells           | Taste cells that respond to 50mM KCl (indicating the presence of VGCC) and bitter, sweet and/or umami stimuli.                                             |
| Taste-only cells                | Taste cells from the IP <sub>3</sub> R3-KO mouse that lack GFP expression (are not Type II cells) and do not respond to 50mM KCl (are not Type III cells). |

Table S1. Definition of taste cell populations analyzed.

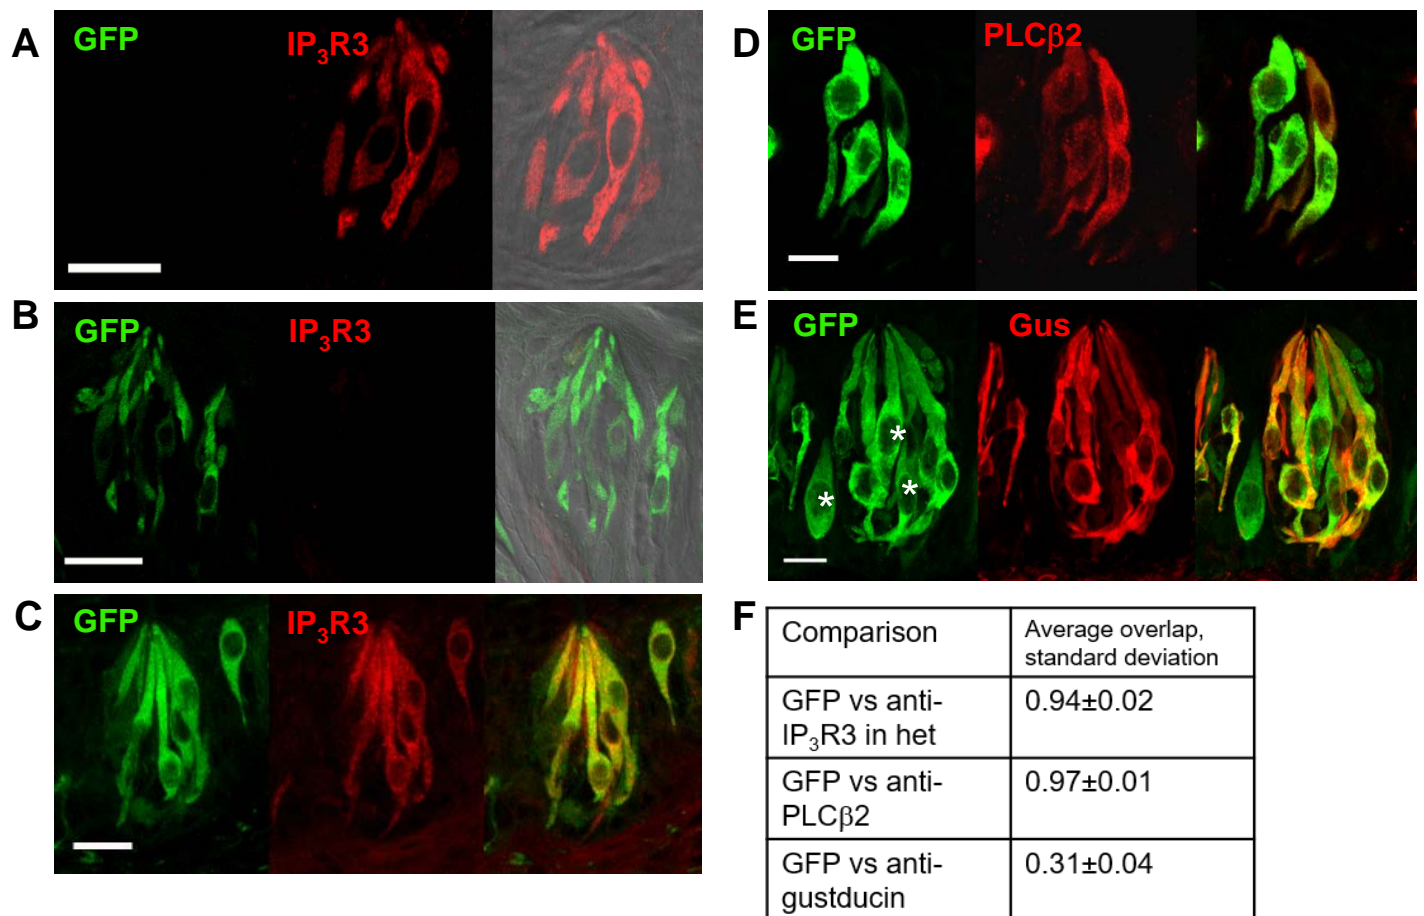

**Figure S1. Characterization of the IP<sub>3</sub>R3-KO mice.** A) LSCMs (stack of 5 slices, 1 μm each) from WT mice identified anti-IP<sub>3</sub>R3 labeling in taste receptor cells from the CV (n=3). B) IP<sub>3</sub>R3-KO mice express GFP in lieu of IP<sub>3</sub>R3 and were not labeled by anti-IP<sub>3</sub>R3 (n=6). C) LSCMs of the IP<sub>3</sub>R3-het mouse identified strong co-localization between anti-IP<sub>3</sub>R3 labeling and GFP expression. D) Anti-PLCβ2 labeling in IP<sub>3</sub>R3-KO mice found that PLCβ2 co-localizes with GFP, indicating that IP<sub>3</sub>R3-KO-GFP is specific to Type II cells (LSCMs: stack of 5 slices, 1 μm each; n=4). E) α-gustducin is present in a subset of the IP<sub>3</sub>R3-KO-GFP taste cells in the CV (LSCMs: stack of 10 slices, 1 μm each; n=3). Asterisks identify some GFP expressing cells that do not express gustducin. Scale bars = 20 μm. F) Co-localization analysis identified the average (± standard deviation) overlapping expression for each target protein with the GFP expression, n=3 for each.

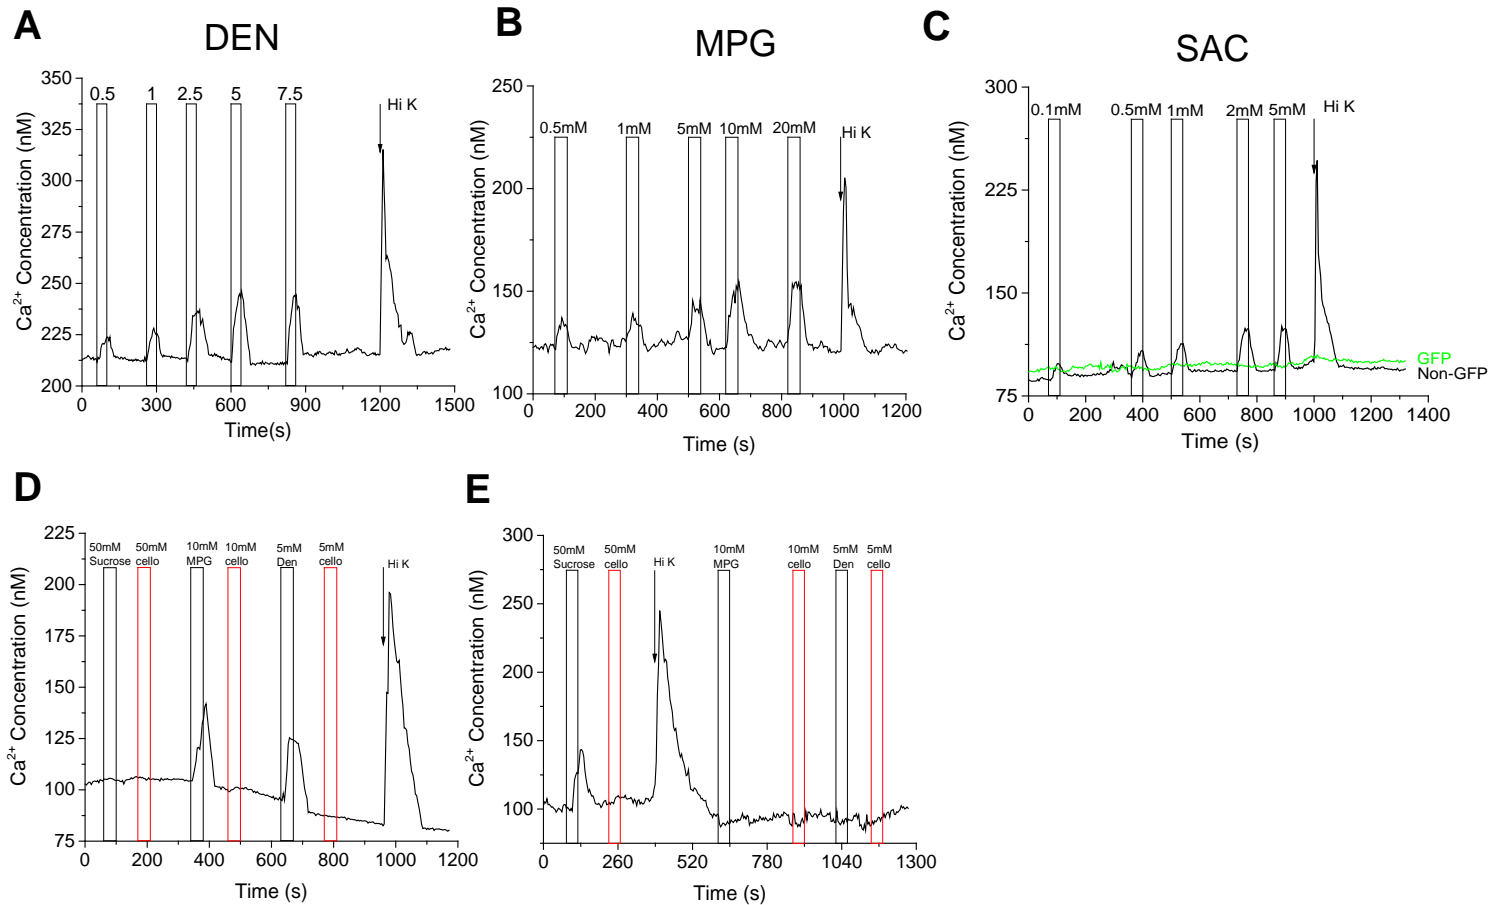

**Figure S2. Taste-evoked  $\text{Ca}^{2+}$  signals are specific to the stimulus.**

A concentration gradient analysis of (A) a bitter stimulus (denatonium), (B) an umami stimulus (MPG) and (C) a sweet stimulus (saccharin) demonstrates that DR cells respond to a wide range of stimulus concentrations. The GFP+ cell (lacks  $\text{IP}_3\text{R3}$ ) in C did not respond to any concentration of saccharin applied. (D-E) Identical concentrations of the compound cellobiose did not generate a  $\text{Ca}^{2+}$  signal in DR cells, indicating that the measured responses are taste-activated and not due to non-specific osmotic effects.

## IP<sub>3</sub>R3

### CV

| CV Stimulus | MS | Cells tested | # of Resp. | P value |
|-------------|----|--------------|------------|---------|
| DEN         | WT | 238          | 102        | 0.06    |
|             | KO | 341          | 107        |         |
| SUC         | WT | 72           | 16         | 0.0004  |
|             | KO | 87           | 1          |         |
| SAC         | WT | 106          | 23         | 0.005   |
|             | KO | 174          | 13         |         |
| SUCRAL      | WT | 121          | 47         | p<0.001 |
|             | KO | 137          | 10         |         |
| MPG         | WT | 81           | 13         | 0.82    |
|             | KO | 301          | 42         |         |
| HI K        | WT | 245          | 75         | 0.68    |
|             | KO | 384          | 108        |         |

### FOL

| FOL Stimulus | MS | Cells tested | # of Resp. | P value |
|--------------|----|--------------|------------|---------|
| DEN          | WT | 46           | 18         | 0.93    |
|              | KO | 100          | 38         |         |
| SAC          | WT | 15           | 1          | 0.69    |
|              | KO | 50           | 4          |         |
| SUCRAL       | WT | 23           | 6          | 0.08    |
|              | KO | 30           | 1          |         |
| MPG          | WT | 18           | 4          | 0.48    |
|              | KO | 73           | 8          |         |
| HI K         | WT | 53           | 14         | 0.93    |
|              | KO | 113          | 31         |         |

### FUN

| FUN Stimulus | MS | Cells tested | # of Resp. | P value |
|--------------|----|--------------|------------|---------|
| DEN          | WT | 76           | 42         | 0.89    |
|              | KO | 59           | 30         |         |
| SUC          | WT | 41           | 10         | 0.89    |
|              | KO | 19           | 6          |         |
| SAC          | WT | 65           | 23         | 0.73    |
|              | KO | 55           | 16         |         |
| SUCRAL       | WT | 85           | 25         | 0.04    |
|              | KO | 99           | 13         |         |
| MPG          | WT | 75           | 17         | 0.4     |
|              | KO | 81           | 12         |         |
| HI K         | WT | 104          | 33         | 0.7     |
|              | KO | 103          | 28         |         |

**Figure S3.** Tables of the mouse line, number of mice tested, number of cells tested and number of responses recorded from the CV, FOL, and FUN papillae of the WT and IP<sub>3</sub>R3-KO mice data shown in Figure 2. Chi-square analysis with Yate's correction for continuity was used to identify significant differences in the response frequency between WT and KO mice for each stimulus in each papillae.

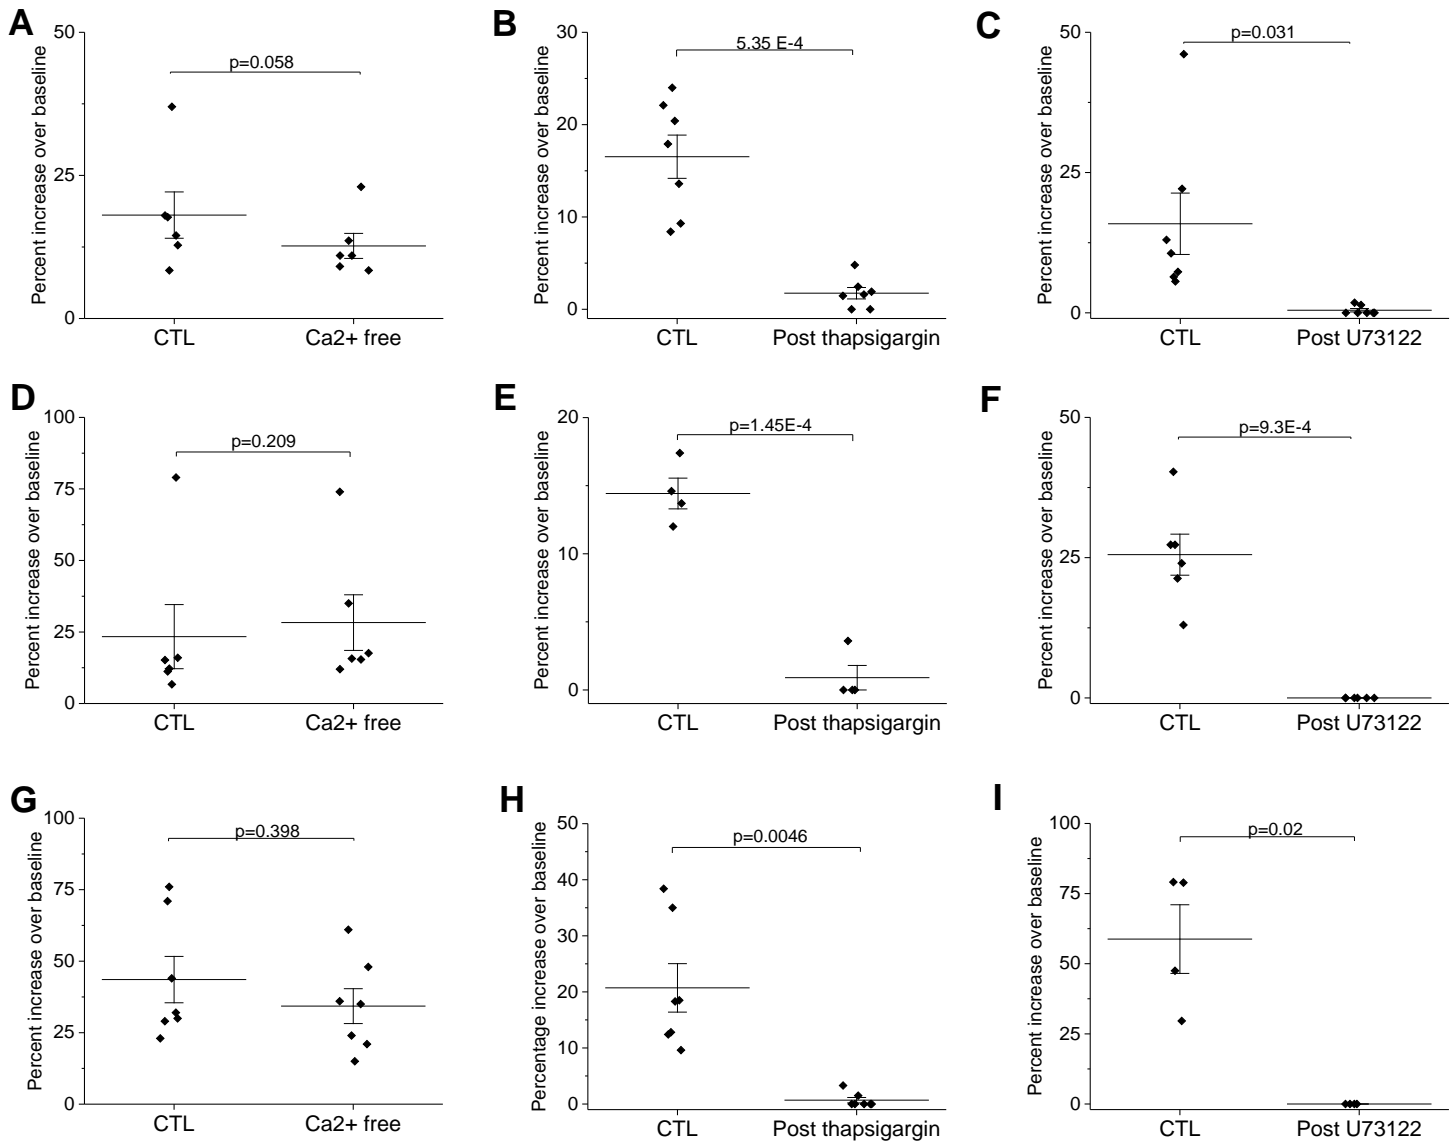

**Figure S4. Taste-evoked Ca<sup>2+</sup> release in IP<sub>3</sub>R3-KO mice is dependent upon PLC activity and Ca<sup>2+</sup> release from internal stores.** Individual data points of the data presented in Figure 3. A) Bitter-evoked taste responses (5mM Den, n=6) persist in the absence of extracellular calcium (Ca<sup>2+</sup>-free) and are abolished by the SERCA pump inhibitor thapsigargin (B, n=7) as well as the PLC blocker U73122 (C, n=7). D) Responses to sweet stimuli (50mM sucrose, n=6) persist in Ca<sup>2+</sup>-free and are abolished by thapsigargin (E, n=4) and U73122 (F, n=6). G) Umami stimuli (10mM MPG) persist in Ca<sup>2+</sup>-free (n=7) and were abolished by thapsigargin (H, n=7) and U73122 (I, n=4). A two-tailed Student's t test was used to identify significant differences for each experimental condition.

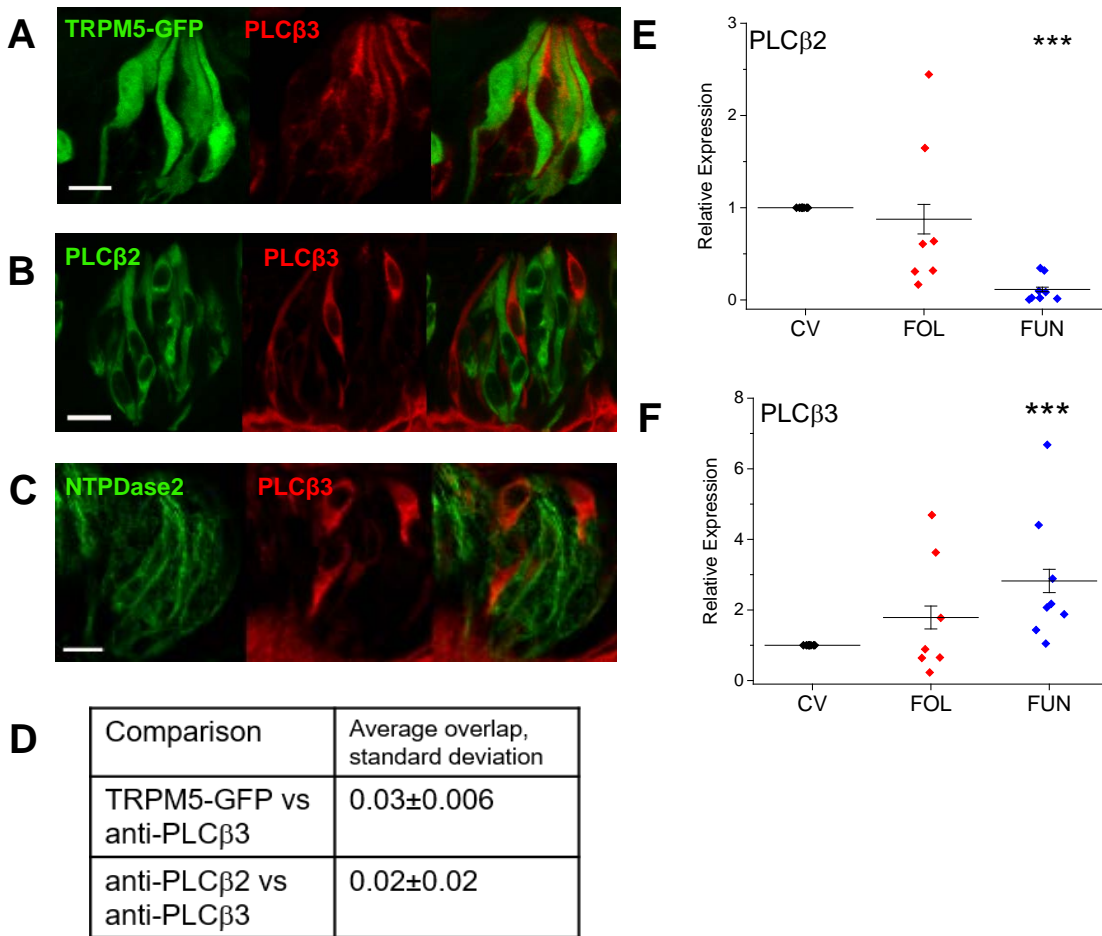

**Figure S5. Expression of PLCβ3 in taste papillae.** A) Anti-PLCβ3 labeling in the CV of TRPM5-GFP mice determined that PLCβ3 is expressed in taste cells lacking GFP expression (LSCMs: stack of 5 slices, 1μm each; n=4). B) Co-labeling with anti-PLCβ2 and anti-PLCβ3 in the CV of C57BL/6 mice revealed that these PLCβs are expressed in separate taste cell populations (LSCMs: stack of 5 slices, 1μm each; n=3). C) Co-labeling with anti-NTPDase2 and anti-PLCβ3 in the CV of C57BL/6 mice determined that these markers are expressed in separate taste cell populations (LSCMs: stack of 5 slices, 1μm each; n=3). Scale bar = 10μM. D) Co-localization analysis identified the average (± standard deviation) overlapping expression for PLCβ3 with TRPM5-GFP or anti-PLCβ2 expression, n=3 for each. mRNA was isolated from taste cells originating in the different papillae types from C57BL/6 mice. Taste cells were analyzed from at least five different mice for each. Values were normalized to GAPDH expression and are presented as a ratio to values from the CV papillae for (E) PLCβ2 and (F) PLCβ3. (\*\*\*, p<0.001). A one-way ANOVA with p<0.05 set as the limit of significance was used to identify any differences in the relative mRNA levels between papillae types.

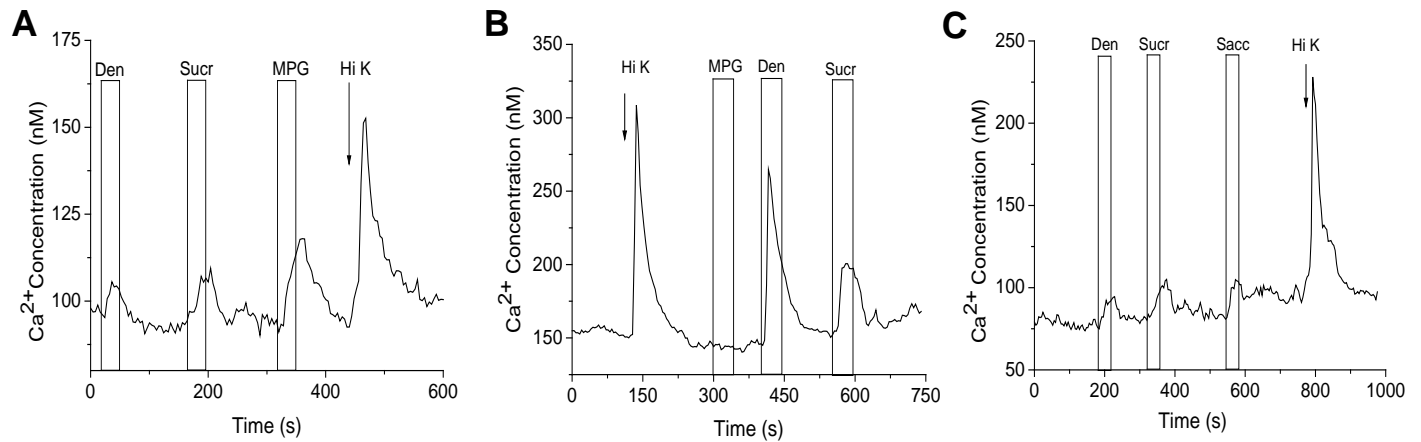

**Figure S6. Dual responsive cells are present in multiple mouse lines.** Control imaging experiments were performed using GAD67-GFP mice and C57BL/6 mice. GAD67-GFP is expressed in a large subset of Type III mouse taste cells (34). A-B) Representative traces of DR taste cells that responded to bitter, sweet and/or umami stimuli and Hi KCl (50mM) in GAD67-GFP mice. DR taste cells were present in both GAD67-GFP + (A) and -GFP- (B) taste cells. C) Experiments in C57BL/6 mice also identified the presence of DR taste cells.



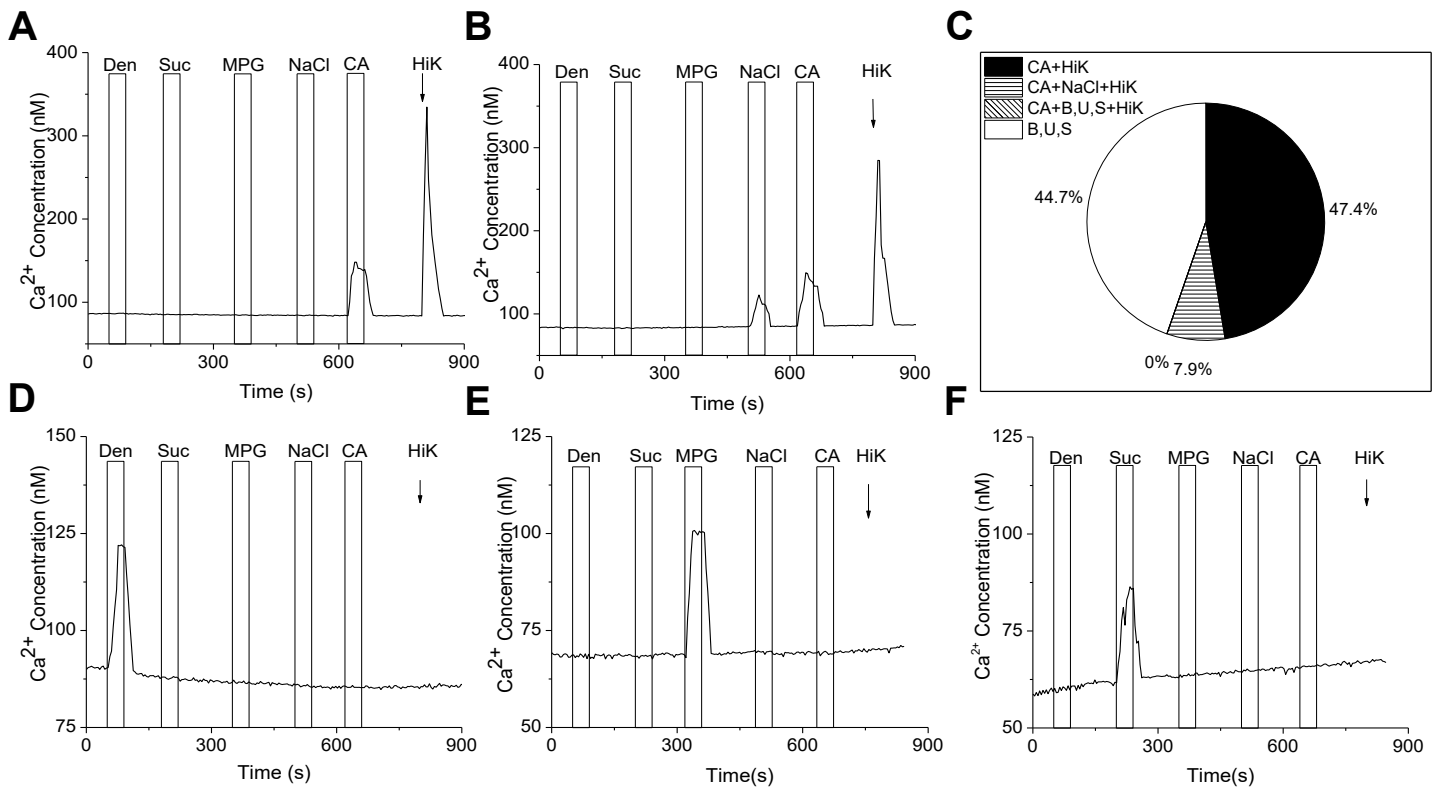

**Figure S7. Stimulus evoked Ca<sup>2+</sup> responses in taste cells in PLC $\beta$ 3-KO mice.** A) Representative trace of taste cells from PLC $\beta$ 3-KO mice that responded to 50mM citric acid (CA) and KCl (50mM) but did not respond to bitter (5mM denatonium), sweet (20mM sucralose) or umami (10mM monopotassium glutamate, MPG) stimuli. B) Representative trace of a separate subset of cells that responded to 250mM NaCl, CA and KCl but were not sensitive to the bitter, sweet, umami stimuli tested. C) Summary of responsive taste cells from PLC $\beta$ 3-KO mice (n=38): CA and KCl (n=18); CA, NaCl and KCl (n=3); CA, KCl, and bitter, sweet and/or umami stimuli (B,U,S) (n=0); and B,U,S only (n=17). Representative taste-evoked responses for bitter (D), sweet (E) and umami (F) in the PLC $\beta$ 3-KO mice. None of these cells responded to CA or KCl.

# PLC $\beta$ 3

## CV

## FOL

## FUN

| CV Stimulus | MS | Cells tested | # of Resp. | P value |
|-------------|----|--------------|------------|---------|
| DEN         | WT | 221          | 86         | 0.018   |
|             | KO | 138          | 30         |         |
| SUC         | WT | 191          | 36         | 0.039   |
|             | KO | 112          | 9          |         |
| SAC         | WT | 198          | 22         | 0.02    |
|             | KO | 130          | 4          |         |
| ACEK        | WT | 181          | 27         | 0.04    |
|             | KO | 111          | 6          |         |
| MPG         | WT | 182          | 32         | 0.031   |
|             | KO | 116          | 8          |         |
| HI K        | WT | 221          | 82         | 0.06    |
|             | KO | 138          | 32         |         |
| DR          | WT | 221          | 59         | 0.0008  |
|             | KO | 138          | 12         |         |

| FOL Stimulus | MS | Cells tested | # of Resp. | P value |
|--------------|----|--------------|------------|---------|
| DEN          | WT | 233          | 85         | .144    |
|              | KO | 113          | 28         |         |
| SUC          | WT | 173          | 21         | 0.97    |
|              | KO | 65           | 7          |         |
| SAC          | WT | 156          | 27         | 0.04    |
|              | KO | 86           | 5          |         |
| ACEK         | WT | 163          | 28         | 0.04    |
|              | KO | 76           | 4          |         |
| MPG          | WT | 179          | 34         | 0.21    |
|              | KO | 67           | 3          |         |
| HI K         | WT | 243          | 68         | 0.08    |
|              | KO | 120          | 20         |         |
| DR           | WT | 243          | 45         | 0.002   |
|              | KO | 120          | 5          |         |

| FUN Stimulus | MS | Cells tested | # of Resp. | P value |
|--------------|----|--------------|------------|---------|
| DEN          | WT | 112          | 52         | 0.003   |
|              | KO | 117          | 23         |         |
| SUC          | WT | 86           | 17         | 0.91    |
|              | KO | 107          | 19         |         |
| SAC          | WT | 93           | 22         | 0.015   |
|              | KO | 111          | 10         |         |
| ACEK         | WT | 84           | 12         | 0.015   |
|              | KO | 108          | 3          |         |
| MPG          | WT | 81           | 10         | 0.016   |
|              | KO | 107          | 2          |         |
| HI K         | WT | 113          | 15         | 0.053   |
|              | KO | 116          | 5          |         |
| DR           | WT | 113          | 13         | 0.001   |
|              | KO | 116          | 0          |         |

**Figure S8. Tables of the mouse line, number of mice tested, number of cells tested and number of responses recorded from the CV, FOL, and FUN papillae of the WT and PLC $\beta$ 3-KO mice data shown in Figure 6. Chi-square analysis with Yate's correction for continuity was used to identify significant differences in the response frequency between WT and KO mice for each stimulus in each papillae.**

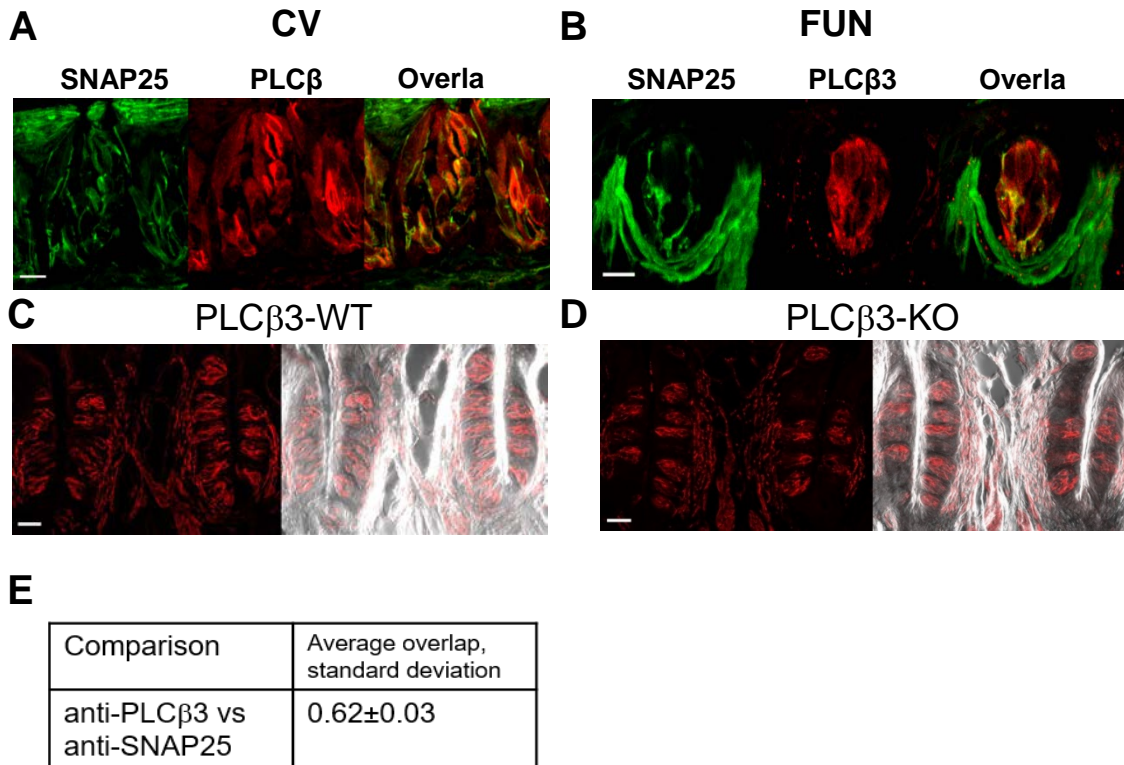

**Figure S9. PLC $\beta$ 3 is expressed in some Type III taste cells.** Immunohistochemical analyses (LSCMs: stack of 5 slices, 1 $\mu$ m each) using anti-PLC $\beta$ 3 and anti-SNAP25 revealed some co-localization between PLC $\beta$ 3 and SNAP25, confirming that PLC $\beta$ 3 is expressed in some Type III cells but is not restricted in its expression to this taste cell type (A, CV papillae, n=3; B, Fun papillae, n=3) Scale bar=20 $\mu$ M. Labeling with anti-SNAP25 in the CV of PLC $\beta$ 3-WT (C) and PLC $\beta$ 3-KO (D) mice revealed no differences in the expression level of this synaptic marker (n=5 mice for each). Scale bars = 50  $\mu$ m. E) Co-localization analysis identified the average ( $\pm$  standard deviation) overlapping expression for PLC $\beta$ 3 with anti-SNAP25 expression, n=3.

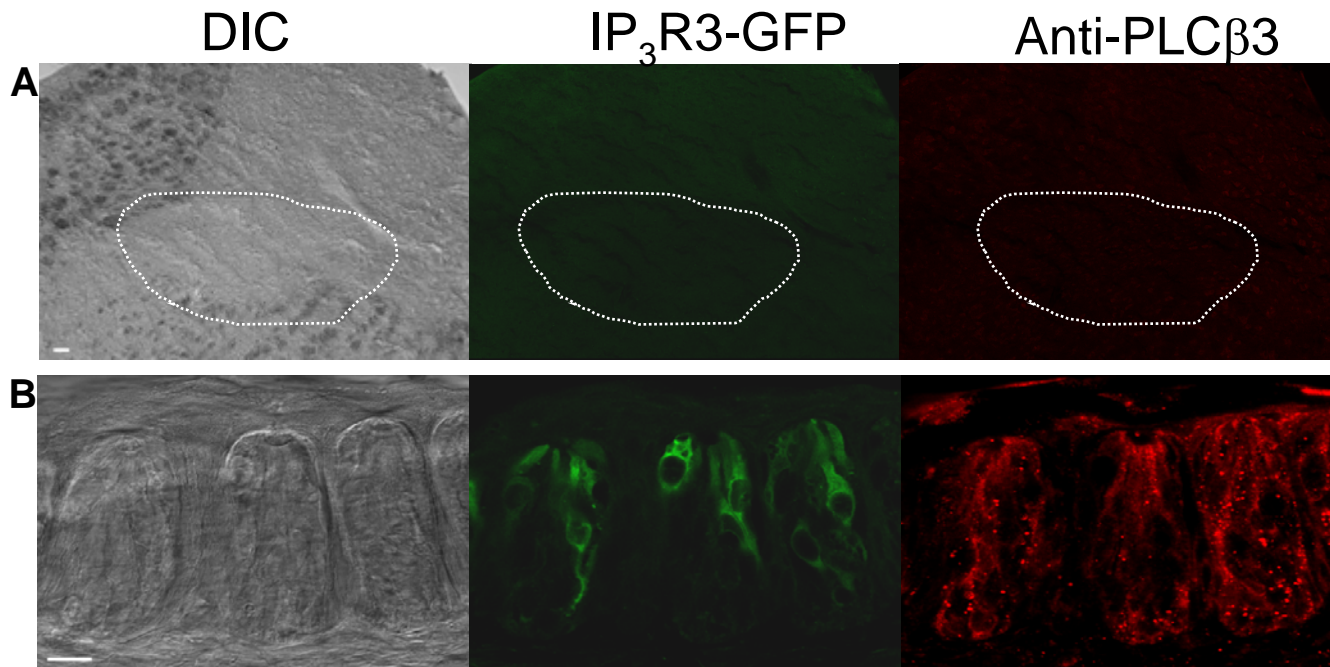

**Figure S10. Neither IP<sub>3</sub>R3 nor PLCβ3 is expressed in IRNTS.**

CV papillae and IRNTS sections were evaluated in parallel. A) Analyses of the brain sections from the IP<sub>3</sub>R3-KO mice revealed no GFP labelling in the IRNTS. Immunohistochemical analysis using anti-PLCβ3 also did not detect any PLCβ3 expression. Scale bar=50μm. B) LSCM analyses (n=5 sections, 1 μM each) of the tongues from the same mice identified the expression of IP<sub>3</sub>R3-KO-GFP and PLCβ3 in the taste receptor cells from the CV papillae (n=3). Scale bar=10μm.

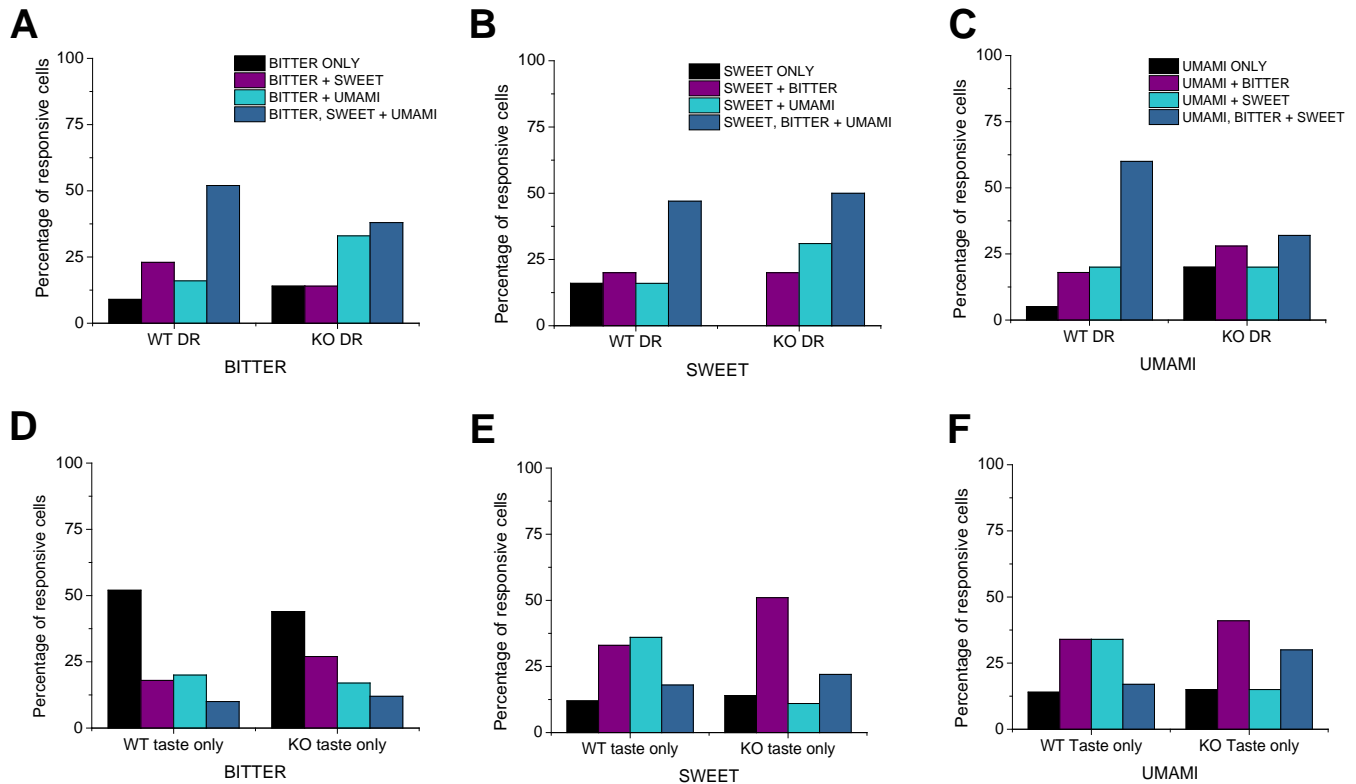

**Figure S11. Analyses of the different taste cell populations that responded to taste stimuli.** Graphs show the percent of the responses for each taste quality tested. A-C) Response profiles for bitter, sweet and umami stimuli from the DR taste cells in WT (n=29 mice, 62 cells) and IP<sub>3</sub>R3-KO (n=18 mice, 31 cells) mice. Taste cells that were stimulated with bitter, sweet and umami stimuli as well as 50mM KCl and responded to at least one of the taste stimuli and KCl were analyzed. The relative percentage of DR taste cells that responded to 1, 2, or 3 taste qualities is shown for each taste quality analyzed. Chi-square analysis with Yate's correction for continuity found no significant differences between the WT and IP<sub>3</sub>R3-KO mice for bitter (A), sweet (B), or umami (C) response profiles. The same analysis was applied to taste cells that responded to at least one bitter, sweet or umami stimulus but did not respond to 50mM KCl for WT (n=37 mice, 85 cells) and IP<sub>3</sub>R3-KO (n=33 mice, 78 cells) mice. These data are shown for bitter (D), sweet (E), and umami (F). No significant differences were found between WT and IP<sub>3</sub>R3-KO mice.
